# Supplementary material for: The Improving Rural Cancer Outcomes (IRCO) Trial: a factorial cluster-randomised controlled trial of a complex intervention to reduce time to diagnosis in rural patients with cancer in Western Australia: a study protocol
Source: PubMed Central journal article supplement — BMJ Open. 2014 Sep 17;4(9):e006156. doi: 10.1136/bmjopen-2014-006156 (PMC4166137; doi:10.1136/bmjopen-2014-006156), 2014-09-17
Supplement: bmjopen-2014-006156.draft_revisions.pdf [file bmjopen-2014-006156.draft_revisions.pdf]

# BMJ Open

## The IRCO Trial: a factorial cluster-randomised controlled trial of a complex intervention to reduce time to diagnosis in rural cancer patients in Western Australia: study protocol.

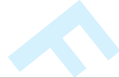

|                                 |                                                                                                                                                                                                                                                                                                                                                                                                                                                                                                                                                                                                                                                                                                                                                                                                                                                                                                                                                                                                                                                                                                                                                                                                          |
|---------------------------------|----------------------------------------------------------------------------------------------------------------------------------------------------------------------------------------------------------------------------------------------------------------------------------------------------------------------------------------------------------------------------------------------------------------------------------------------------------------------------------------------------------------------------------------------------------------------------------------------------------------------------------------------------------------------------------------------------------------------------------------------------------------------------------------------------------------------------------------------------------------------------------------------------------------------------------------------------------------------------------------------------------------------------------------------------------------------------------------------------------------------------------------------------------------------------------------------------------|
| Journal:                        | <i>BMJ Open</i>                                                                                                                                                                                                                                                                                                                                                                                                                                                                                                                                                                                                                                                                                                                                                                                                                                                                                                                                                                                                                                                                                                                                                                                          |
| Manuscript ID:                  | bmjopen-2014-006156                                                                                                                                                                                                                                                                                                                                                                                                                                                                                                                                                                                                                                                                                                                                                                                                                                                                                                                                                                                                                                                                                                                                                                                      |
| Article Type:                   | Protocol                                                                                                                                                                                                                                                                                                                                                                                                                                                                                                                                                                                                                                                                                                                                                                                                                                                                                                                                                                                                                                                                                                                                                                                                 |
| Date Submitted by the Author:   | 21-Jul-2014                                                                                                                                                                                                                                                                                                                                                                                                                                                                                                                                                                                                                                                                                                                                                                                                                                                                                                                                                                                                                                                                                                                                                                                              |
| Complete List of Authors:       | Emery, Jon; University of Melbourne, General Practice and Primary Care Academic Centre<br>Gray, Victoria; The University of Western Australia, School of Population Health<br>Walter, Fiona; University of Cambridge, Dept of Public Health and Primary Care<br>Cheetham, Shelley; The University of Western Australia, School of Primary, Aboriginal and Rural Health Care<br>Croager, Emma; Cancer Council Western Australia, Education and Research; Curtin University, Centre for Behavioural Research and Cancer Control<br>Slevin, Terry; Cancer Council WA, Education and Research<br>Saunders, Christobel; The University of Western Australia, School of Surgery<br>Threlfall, Timothy; The Department of Health of Western Australia, Western Australian Cancer Registry<br>Auret, Kirsten; The University of Western Australia, Rural Clinical School of Western Australia<br>Nowak, Anna; Sir Charles Gairdner Hospital, Department of Medical Oncology<br>Geelhoed, Elizabeth; The University of Western Australia, School of Population Health<br>Bulsara, Max; University of Notre Dame, Biostatistics<br>Holman, Darcy; The University of Western Australia, School of Population Health |
| <b>Primary Subject Heading</b>: | Health services research                                                                                                                                                                                                                                                                                                                                                                                                                                                                                                                                                                                                                                                                                                                                                                                                                                                                                                                                                                                                                                                                                                                                                                                 |
| Secondary Subject Heading:      | General practice / Family practice, Oncology, Public health, Research methods                                                                                                                                                                                                                                                                                                                                                                                                                                                                                                                                                                                                                                                                                                                                                                                                                                                                                                                                                                                                                                                                                                                            |
| Keywords:                       | Epidemiology < ONCOLOGY, Health policy < HEALTH SERVICES ADMINISTRATION & MANAGEMENT, MEDICAL EDUCATION & TRAINING, PRIMARY CARE, PUBLIC HEALTH                                                                                                                                                                                                                                                                                                                                                                                                                                                                                                                                                                                                                                                                                                                                                                                                                                                                                                                                                                                                                                                          |
|                                 |                                                                                                                                                                                                                                                                                                                                                                                                                                                                                                                                                                                                                                                                                                                                                                                                                                                                                                                                                                                                                                                                                                                                                                                                          |

1  
2  
3  
4  
5  
6  
7  
8  
9  
10  
11  
12  
13  
14  
15  
16  
17  
18  
19  
20  
21  
22  
23  
24  
25  
26  
27  
28  
29  
30  
31  
32  
33  
34  
35  
36  
37  
38  
39  
40  
41  
42  
43  
44  
45  
46  
47  
48  
49  
50  
51  
52  
53  
54  
55  
56  
57  
58  
59  
60

SCHOLARONE™  
Manuscripts

For peer review only

1  
2  
3  
4 **The IRCO Trial: a factorial cluster-randomised controlled**  
5 **trial of a complex intervention to reduce time to diagnosis in**  
6 **rural cancer patients in Western Australia: study protocol.**  
7  
8  
9

10  
11  
12  
13 Jon D Emery, Victoria Gray, Fiona M Walter, Shelley Cheetham, Emma J Croager, Terry  
14 Slevin, Christobel Saunders, Tim Threlfall, Kirsten Auret, Anna K Nowak, Elizabeth Geelhoed,  
15 Max Bulsara, C D'Arcy J Holman  
16  
17

18  
19  
20 Contact details:

21  
22 Professor Jon Emery, General Practice & Primary Care Academic Centre, 200 Berkeley St,  
23 Carlton, Vic 3053; [jon.emery@unimelb.edu.au](mailto:jon.emery@unimelb.edu.au); M: 0417 123 271; W: 03 9035 8018  
24

25  
26 Jon D Emery: General Practice and Primary Health Care Academic Centre, Melbourne  
27 Medical School, The University of Melbourne, Melbourne, Australia. School of Primary,  
28 Aboriginal and Rural Health Care, The University of Western Australia, Crawley, Australia;  
29 Victoria Gray: School of Primary, Aboriginal and Rural Health Cancer, The University of  
30 Western Australia, Crawley, Australia; School of Population Health, The University of  
31 Western Australia, Crawley, Australia; Education and Research Division, Cancer Council  
32 Western Australia, Perth, Australia.

33  
34 Fiona M Walter: The Primary Care Unit, Department of Public Health & Primary Care,  
35 University of Cambridge, Cambridge, United Kingdom.

36  
37 Shelley Cheetham: School of Primary, Aboriginal and Rural Health Cancer, The University of  
38 Western Australia, Crawley, Australia.

39  
40 Emma J Croager: Education & Research Division, Cancer Council Western Australia, Perth,  
41 Australia; Centre for Behavioural Research in Cancer Control, Curtin University, Perth,  
42 Australia.

43  
44 Terry Slevin: Education & Research Division, Cancer Council Western Australia, Perth,  
45 Australia; Centre for Behavioural Research in Cancer Control, Curtin University, Perth,  
46 Australia.

47  
48 Christobel Saunders: School of Surgery, The University of Western Australia, Crawley,  
49 Australia.

50  
51 Timothy Trelfall: Western Australia Cancer Registry, The Department of Health of Western  
52 Australia, Perth, Australia.

53  
54 Kirsten Auret: Rural Clinical School of WA, The University of Western Australia, Crawley,  
55 Australia.

56  
57 Anna K Nowak: School of Medicine and Pharmacology, The University of Western Australia,  
58 Crawley, Australia; Department of Medical Oncology, Sir Charles Gairdner Hospital, Perth,  
59 Western Australia.

60  
Elizabeth Geelhoed: School of Population Health, The University of Western Australia,  
Crawley, Australia

1  
2  
3  
4  
5  
6  
7  
8  
9  
10  
11  
12  
13  
14  
15  
16  
17  
18  
19  
20  
21  
22  
23  
24  
25  
26  
27  
28  
29  
30  
31  
32  
33  
34  
35  
36  
37  
38  
39  
40  
41  
42  
43  
44  
45  
46  
47  
48  
49  
50  
51  
52  
53  
54  
55  
56  
57  
58  
59  
60

Max Bulsara: Institute of Health and Rehabilitation Research, Notre Dame University,  
Freemantle, Australia.  
C D’Arcy J Holman: School of Population Health, The University of Western Australia,  
Crawley, Australia

For peer review only

## ***Abstract***

### *Introduction*

While overall survival for most common cancers in Australia is improving, the rural-urban differential has been widening, with significant excess deaths due to lung, colorectal, breast and prostate cancer in regional Australia. Internationally a major focus on understanding variations in cancer outcomes has been later presentation to healthcare and later diagnosis. Approaches to reducing time to diagnosis of symptomatic cancer include public symptom awareness campaigns and interventions in primary care to improve early cancer detection. This paper reports the protocol of a factorial cluster-randomised trial of community and General Practice (GP) level interventions to reduce the time to diagnosis of cancer in rural Western Australia (WA).

### *Methods and analysis*

The Community Intervention is a symptom awareness campaign tailored for rural Australians delivered through a community engagement model. The GP intervention includes a resource card with symptom risk assessment charts and local referral pathways implemented through multiple academic detailing visits and case studies. Participants are eligible if recently diagnosed with breast, colorectal, lung or prostate cancer who reside in specific regions of rural WA with a planned sample size of 1,350. The primary outcome is the Total Diagnostic Interval, defined as the duration from first symptom (or date of cancer screening test) to cancer diagnosis. Secondary outcomes include cancer stage, healthcare utilisation, disease-free status, survival at two and five years and cost-effectiveness.

### *Ethics and dissemination*

Ethics approval has been granted by the University of Western Australia and from all relevant hospital recruitment sites in Western Australia. Results of this trial will be reported in peer-reviewed publications and in conference presentations.

### *Registration details*

Australian New Zealand Clinical Trials Registry (ANZCTR). ACTRN12610000872033

## Strengths and Limitations of this study

- This is the first RCT to test the implementation of cancer risk tools based on the Hamilton CAPER studies. It is also novel in that it will measure the effect of separate and combined community and GP interventions on time to cancer diagnosis.
- Longer term follow-up will assess the impact on survival.
- The community control area was matched as closely as possible within the constraints of the population distribution in different regions of Western Australia.

## Background

Rural Australians are more likely to die within 5 years of a cancer diagnosis than people from metropolitan areas.(1) While overall survival for most common cancers in Australia is improving, the rural-urban differential has been widening, with significant excess deaths due to lung, colorectal, breast and prostate cancer in regional Australia.(2) Similar disparities in cancer outcomes across certain patient groups have been described worldwide.(3) As part of the International Cancer Benchmarking Partnership, a major focus on understanding variations in cancer outcomes has been later presentation to healthcare and later diagnosis.(4)

Previous studies have shown that patients living in rural Australia are less likely to receive curative or reconstructive surgery, radiotherapy or anti-cancer drug treatment.(5-8) Policy initiatives have focused, therefore, on reducing disparities in access to treatment.(9) Access to treatment is an important determinant of outcome, but later presentation and stage at diagnosis have also been observed in rural cancer patients.(10, 11) International research suggests that the time taken to appraise symptoms and seek help (so-called 'patient delay') and management in primary care are also key determinants of cancer outcomes.(12) Time to diagnosis is associated with poorer survival for several common cancers.(13, 14)

One of the approaches to reducing later presentation to healthcare has been community symptom awareness campaigns. These have formed a major component of the UK National Awareness and Early Diagnosis Initiative(NAEDI) as part of the policy to improve cancer outcomes.(15) A systematic review of cancer symptom awareness campaigns published in 2009 found insufficient evidence about their effect on presentation to healthcare.(16) Since then further studies have begun to show potential effects on presentation and cancer diagnoses.(17)

A second approach has aimed at improving early recognition of patients in primary care with symptoms suggestive of cancer. A major challenge for general practitioners (GPs) is that the symptoms of many cancers are common in the community and overlap with prevalent benign conditions. GPs need to assess the risk, or diagnostic probability, of an underlying

1  
2  
3 cancer and determine whether further investigation is justified. Until recently, there was  
4 little epidemiological evidence demonstrating how well symptoms predict risk of an  
5 underlying cancer from primary care populations.(18) Analysis of data in case-control  
6 studies using large UK general practice databases, notably the CAPER (Cancer Prediction in  
7 Exeter) studies(19-22) and QCancer research(23, 24), has led to significant advances in our  
8 understanding of the epidemiology of cancer symptoms in primary care.  
9

10  
11  
12  
13  
14  
15 The CAPER studies have quantified the risk of individual and paired symptoms, signs and  
16 primary care investigations for a number of cancers including colorectal, lung and prostate.  
17 These have been evaluated as risk assessment tools (RATs) in paper versions(25) and are  
18 currently undergoing evaluation as computerised decision support tools embedded in the  
19 electronic medical records of English general practices.(26) Various interventions including  
20 audit and feedback, educational visits, guidelines and decision support have been tested in  
21 general practice to improve cancer diagnosis.(27) None of the 22 trials included in a  
22 systematic review of interventions to support cancer diagnosis in primary care examined  
23 effects on diagnostic delay, although audit and feedback was shown to improve clinical  
24 management.(28)  
25  
26  
27  
28  
29  
30  
31  
32

33  
34  
35 Conducting research in the field of 'diagnostic delay' in cancer has many methodological  
36 challenges. The Aarhus Statement discusses these and provides consensus guidelines on  
37 appropriate definitions and the conduct and reporting of such research.(29) One  
38 recommendation is the application of theoretical models such as The Model of Pathways to  
39 Treatment (30, 31) (Figure 1). This model proposes four key intervals:  
40  
41  
42

- 43 1. The **Appraisal Interval**. The nature of a person's symptoms is one of the most important  
44 factors determining the duration of the Appraisal Interval. Misattribution of symptoms  
45 either to a previous benign or concurrent condition or non-recognition of the  
46 seriousness of symptoms contribute to longer Appraisal Intervals.  
47  
48  
49
- 50 2. The **Help-Seeking Interval**. Various factors may contribute to this interval including  
51 patient factors such as competing events (e.g. holidays), and emotional ones such as  
52 fear. This includes fear of the consultation and examination, or of the diagnosis and  
53 treatment. Access to primary care and sanctioning help-seeking by family or friends, so  
54  
55  
56  
57  
58  
59  
60



1  
2  
3 that patients do not perceive themselves as wasting the doctor's time, are also  
4 important factors.(32)

- 5  
6  
7 3. The **Diagnostic Interval**. Depending on the healthcare setting this may involve a series  
8 of healthcare visits, referrals and investigations and often represents a complex process.  
9 System factors including the role of primary care as a gatekeeper and access to  
10 investigations and specialist care are key factors determining this interval.  
11  
12 4. **The Pre-Treatment Interval**. The time from formal cancer diagnosis to initiation of  
13 treatment is also strongly influenced by several healthcare system factors such as access  
14 to staging investigations and specialised treatments.  
15  
16  
17  
18  
19

20  
21 **Figure 1: Model of Pathways to Treatment** (30, 31)

22  
23  
24 Our research on rural cancer outcomes is applying the well-established Medical Research  
25 Council (MRC) methodological framework for the design and evaluation of complex  
26 interventions.(33, 34) Our initial exploratory mixed-methods study aimed to explore the  
27 context of rural cancer diagnosis in WA and inform the development of our complex  
28 intervention. In summary, in-depth interviews with 66 people recently diagnosed with  
29 breast, lung, prostate or colorectal cancer from regional WA found longer duration of  
30 symptom appraisal for colorectal cancer compared with other cancers. Participants defined  
31 core characteristics of rural Australians as optimism, stoicism and machismo. These  
32 features, as well as poorer access to health care, contributed to later presentation of  
33 cancer.(18) In addition, there were significant overall differences between cancers in terms  
34 of time from presentation in general practice to referral, from GP referral to specialist  
35 appointment, and from specialist appointment to cancer diagnosis. These differences were  
36 due to the nature of presenting symptoms, access to diagnostic tests and multiple visits to  
37 specialists. Breast cancer was diagnosed more quickly because its symptoms are more  
38 specific and well recognised by the community, and due to better access to diagnostic tests  
39 and specialist one-stop clinics.(35)  
40  
41  
42  
43  
44  
45  
46  
47  
48  
49  
50  
51  
52

53  
54 These findings contributed to the development of the interventions and design of the  
55 Improving Rural Cancer Outcomes (IRCO) Trial: a factorial cluster-randomised controlled  
56 trial of community-based and general practice-based interventions which aims to reduce  
57  
58  
59  
60

1  
2  
3 the time to diagnosis in rural patients presenting with prostate, breast, colorectal or lung  
4 cancer in Western Australia.  
5  
6  
7  
8

## 9 10 **Methods and Trial Design**

### 11 *Design and setting*

12  
13 This 2x2 factorial cluster randomised controlled trial is set in Western Australia, the largest  
14 Australian state geographically, with a population of 2.29 million (approximately 10% of the  
15 Australian population). Two thirds of the WA population live in metropolitan Perth and the  
16 remainder are widely geographically dispersed. Two Trial Areas were matched for  
17 population size, demographics including age and Aboriginality, and similar cancer incidence ,  
18 based on the most recent available data (from 2006) when the trial was planned (Figure 2  
19 presents more recent data on population size from 2010). Trial Area A comprises the  
20 Wheatbelt (155,256 km<sup>2</sup>), Goldfields (770,488 km<sup>2</sup>) and Great Southern (39,007 km<sup>2</sup>)  
21 regions, and Trial Area B includes the Peel/South West (29,646 km<sup>2</sup>) and MidWest  
22 (470,000km<sup>2</sup>) regions.(36)  
23  
24  
25  
26  
27  
28  
29  
30  
31  
32

33 **Figure 2: Map of Western Australia depicting the regional boundaries of Trial Area A,**  
34 **receiving the community intervention, and Trial Area B, acting as the community**  
35 **control.**  
36  
37  
38  
39

### 40 **Randomisation**

41  
42 Trial Area A has been allocated to receive the community symptom awareness campaign  
43 intervention and Trial Area B acts as the community campaign control region. In both Trial  
44 Areas general practices have been randomised to receive the education intervention or  
45 control, stratified by practice size (<=1 GP; 2 to 4 GPs; 5+ GPs). GPs who worked at more  
46 than one practice have been identified, and their practices have been treated as one  
47 practice for the purpose of randomisation to avoid contamination (Figure 3).  
48  
49  
50  
51  
52  
53

54 **Figure 3: The 2x2 factorial cluster randomised controlled trial design.(37)**  
55  
56  
57  
58  
59  
60

1  
2  
3 Practices have been randomly assigned to intervention or control arm using a cluster  
4 version of Zelen's method of post-randomised consent: intervention practices have been  
5 invited to receive the educational package while control practices receive no information  
6 about the trial.(38) This enables non-intervention practices to act as true controls by  
7 minimising the Hawthorne effect in a situation where placebo and double blind  
8 experimental conditions are impossible to achieve. The Hawthorne effect occurs when the  
9 researchers' procedures and communications act as interventions in themselves that  
10 change behaviours, such as if the control cluster were to adopt the practices or policies  
11 promoted to the intervention cluster. This would destroy the trial's ability to identify a  
12 benefit of the intervention, if one exists. Furthermore, it allows a pragmatic delivery of the  
13 intervention and measure of its uptake in routine practice. Intervention practices which  
14 decline the invitation to receive the educational package will be analysed on an intention-  
15 to-treat basis. Randomisation has been performed by the trial statistician. As the number of  
16 working GPs in a given practice varies, the randomisation has taken into account practice  
17 size. Each practice has been categorized into: one GP in the practice, 2-4 GPs or five or  
18 more GPs. A random sample proportional to the size of the practice has been used  
19 employing 'samplepps' macro in Stata.  
20  
21  
22  
23  
24  
25  
26  
27  
28  
29  
30  
31  
32  
33  
34  
35  
36

### 37 ***Patient recruitment and inclusion criteria***

38 From 1 March 2012, four months after the interventions commenced, all patients meeting  
39 the following criteria are being invited to contribute their data for the trial:  
40  
41

- 42 • Adults aged over 18 years;
- 43 • Diagnosed with breast, lung, colorectal or prostate cancer between 1 January 2012  
44 and the recruitment end date of 31 March 2014; and
- 45 • Resident of Trial Areas A or B at the time of diagnosis.  
46  
47  
48  
49

### 50 ***Recruitment Strategy***

51 Eligible participants are identified via:  
52  
53  
54  
55  
56  
57  
58  
59  
60

1  
2  
3 1. The WA Cancer Registry (WACR). A letter and participant information sheet is mailed  
4 from the WACR directly to newly diagnosed cancer patients. After three-weeks non  
5 responders are followed up by the research team via phone or mail.  
6  
7

8 2. Cancer Council Western Australia's (CCWA) residential lodges. We approach eligible  
9 patients while staying at CCWA charitable accommodation during their cancer treatment in  
10 Perth. A large proportion of rural cancer patients, especially those receiving radiotherapy or  
11 chemotherapy, reside in one of the lodges for several weeks during their treatment. Eligible  
12 patients receive the same participant information sheet as part of their Lodge Welcome  
13 Pack by the lodge receptionists and are followed up by the research team.  
14  
15  
16  
17  
18  
19

### 20 ***Study Interventions***

21  
22 The Trial includes interventions at two levels: a community symptom awareness campaign  
23 ('the community intervention'); and a GP educational package incorporating symptom risk  
24 assessment charts and referral guidance which is implemented through multiple academic  
25 detailing visits and case studies ('the GP intervention'). Both interventions are being  
26 delivered between 1 November 2011 to 31 December 2013.  
27  
28  
29  
30  
31

#### 32 *The Community Intervention*

33  
34 We modified existing resources developed for The Cancer Research UK 'Spot Cancer Early'  
35 and the UK National Health Service '3 week cough' campaigns to incorporate the findings of  
36 our exploratory mixed-methods study (18,(35), and to make them relevant to a rural  
37 Australian community.  
38  
39

40  
41 Materials have been further modified following three community forums held in the major  
42 towns of the campaign target regions. Feedback was obtained about the campaign logo,  
43 design, choice of images, locally acceptable language, and contact details. The campaign is  
44 named the Find Cancer Early campaign and the materials explicitly use the Cancer Council  
45 WA branding, recognising the strong community support and credibility of this organisation.  
46  
47 Community members wanted the campaign to focus on the positives associated with early  
48 detection and the use of simple, non-medical terms when describing symptoms. A  
49 campaign message development meeting was then held between the project team, social  
50 marketing experts and health professionals to develop a framework for the campaign and  
51 message hierarchy.  
52  
53  
54  
55  
56  
57  
58  
59  
60

1  
2  
3  
4  
5 The target of the campaign is men and women over the age of 40; it aims to raise awareness  
6 of the symptoms of bowel, lung, prostate and breast cancer, and to help people overcome  
7 the barriers to seeking medical help. The primary campaign item is a plain-language  
8 symptom checklist (Figure 4). Other materials include: newspaper adverts based on  
9 campaign materials; radio adverts for each of the 4 cancers; tumour-specific postcards  
10 featuring regional images and quotations about relevant symptoms (Figure 4); generic  
11 postcards providing strategies to overcome barriers to seeking help (Figure 4); a DVD  
12 outlining tumour specific symptoms featuring health professionals and regional community  
13 members; an Indigenous version of the symptom checklist; a website; and posters and  
14 banners.  
15  
16  
17  
18  
19  
20  
21  
22  
23

24 **Figure 4: Examples of Find Cancer Early resources – General Symptom Checklist, Prostate**  
25 **postcard and Tell your doctor postcard.**  
26  
27

28  
29  
30 Five project officers, with a combined full time equivalent of 3.0, are delivering the  
31 campaign across the three regions of WA in Trial Area A. They use a community  
32 engagement approach building partnerships to deliver and disseminate the campaign  
33 messages with presentations, displays and campaign resource distribution. Paid advertising  
34 and articles in regional newspapers and radio supplement this dissemination strategy.  
35  
36  
37  
38  
39  
40  
41  
42  
43  
44  
45  
46  
47  
48  
49  
50  
51  
52  
53  
54  
55  
56  
57  
58  
59  
60  
61  
62  
63  
64  
65  
66  
67  
68  
69  
70  
71  
72  
73  
74  
75  
76  
77  
78  
79  
80  
81  
82  
83  
84  
85  
86  
87  
88  
89  
90  
91  
92  
93  
94  
95  
96  
97  
98  
99  
100  
101  
102  
103  
104  
105  
106  
107  
108  
109  
110  
111  
112  
113  
114  
115  
116  
117  
118  
119  
120  
121  
122  
123  
124  
125  
126  
127  
128  
129  
130  
131  
132  
133  
134  
135  
136  
137  
138  
139  
140  
141  
142  
143  
144  
145  
146  
147  
148  
149  
150  
151  
152  
153  
154  
155  
156  
157  
158  
159  
160  
161  
162  
163  
164  
165  
166  
167  
168  
169  
170  
171  
172  
173  
174  
175  
176  
177  
178  
179  
180  
181  
182  
183  
184  
185  
186  
187  
188  
189  
190  
191  
192  
193  
194  
195  
196  
197  
198  
199  
200  
201  
202  
203  
204  
205  
206  
207  
208  
209  
210  
211  
212  
213  
214  
215  
216  
217  
218  
219  
220  
221  
222  
223  
224  
225  
226  
227  
228  
229  
230  
231  
232  
233  
234  
235  
236  
237  
238  
239  
240  
241  
242  
243  
244  
245  
246  
247  
248  
249  
250  
251  
252  
253  
254  
255  
256  
257  
258  
259  
260  
261  
262  
263  
264  
265  
266  
267  
268  
269  
270  
271  
272  
273  
274  
275  
276  
277  
278  
279  
280  
281  
282  
283  
284  
285  
286  
287  
288  
289  
290  
291  
292  
293  
294  
295  
296  
297  
298  
299  
300  
301  
302  
303  
304  
305  
306  
307  
308  
309  
310  
311  
312  
313  
314  
315  
316  
317  
318  
319  
320  
321  
322  
323  
324  
325  
326  
327  
328  
329  
330  
331  
332  
333  
334  
335  
336  
337  
338  
339  
340  
341  
342  
343  
344  
345  
346  
347  
348  
349  
350  
351  
352  
353  
354  
355  
356  
357  
358  
359  
360  
361  
362  
363  
364  
365  
366  
367  
368  
369  
370  
371  
372  
373  
374  
375  
376  
377  
378  
379  
380  
381  
382  
383  
384  
385  
386  
387  
388  
389  
390  
391  
392  
393  
394  
395  
396  
397  
398  
399  
400  
401  
402  
403  
404  
405  
406  
407  
408  
409  
410  
411  
412  
413  
414  
415  
416  
417  
418  
419  
420  
421  
422  
423  
424  
425  
426  
427  
428  
429  
430  
431  
432  
433  
434  
435  
436  
437  
438  
439  
440  
441  
442  
443  
444  
445  
446  
447  
448  
449  
450  
451  
452  
453  
454  
455  
456  
457  
458  
459  
460  
461  
462  
463  
464  
465  
466  
467  
468  
469  
470  
471  
472  
473  
474  
475  
476  
477  
478  
479  
480  
481  
482  
483  
484  
485  
486  
487  
488  
489  
490  
491  
492  
493  
494  
495  
496  
497  
498  
499  
500  
501  
502  
503  
504  
505  
506  
507  
508  
509  
510  
511  
512  
513  
514  
515  
516  
517  
518  
519  
520  
521  
522  
523  
524  
525  
526  
527  
528  
529  
530  
531  
532  
533  
534  
535  
536  
537  
538  
539  
540  
541  
542  
543  
544  
545  
546  
547  
548  
549  
550  
551  
552  
553  
554  
555  
556  
557  
558  
559  
560  
561  
562  
563  
564  
565  
566  
567  
568  
569  
570  
571  
572  
573  
574  
575  
576  
577  
578  
579  
580  
581  
582  
583  
584  
585  
586  
587  
588  
589  
590  
591  
592  
593  
594  
595  
596  
597  
598  
599  
600  
601  
602  
603  
604  
605  
606  
607  
608  
609  
610  
611  
612  
613  
614  
615  
616  
617  
618  
619  
620  
621  
622  
623  
624  
625  
626  
627  
628  
629  
630  
631  
632  
633  
634  
635  
636  
637  
638  
639  
640  
641  
642  
643  
644  
645  
646  
647  
648  
649  
650  
651  
652  
653  
654  
655  
656  
657  
658  
659  
660  
661  
662  
663  
664  
665  
666  
667  
668  
669  
670  
671  
672  
673  
674  
675  
676  
677  
678  
679  
680  
681  
682  
683  
684  
685  
686  
687  
688  
689  
690  
691  
692  
693  
694  
695  
696  
697  
698  
699  
700  
701  
702  
703  
704  
705  
706  
707  
708  
709  
710  
711  
712  
713  
714  
715  
716  
717  
718  
719  
720  
721  
722  
723  
724  
725  
726  
727  
728  
729  
730  
731  
732  
733  
734  
735  
736  
737  
738  
739  
740  
741  
742  
743  
744  
745  
746  
747  
748  
749  
750  
751  
752  
753  
754  
755  
756  
757  
758  
759  
760  
761  
762  
763  
764  
765  
766  
767  
768  
769  
770  
771  
772  
773  
774  
775  
776  
777  
778  
779  
780  
781  
782  
783  
784  
785  
786  
787  
788  
789  
790  
791  
792  
793  
794  
795  
796  
797  
798  
799  
800  
801  
802  
803  
804  
805  
806  
807  
808  
809  
810  
811  
812  
813  
814  
815  
816  
817  
818  
819  
820  
821  
822  
823  
824  
825  
826  
827  
828  
829  
830  
831  
832  
833  
834  
835  
836  
837  
838  
839  
840  
841  
842  
843  
844  
845  
846  
847  
848  
849  
850  
851  
852  
853  
854  
855  
856  
857  
858  
859  
860  
861  
862  
863  
864  
865  
866  
867  
868  
869  
870  
871  
872  
873  
874  
875  
876  
877  
878  
879  
880  
881  
882  
883  
884  
885  
886  
887  
888  
889  
890  
891  
892  
893  
894  
895  
896  
897  
898  
899  
900  
901  
902  
903  
904  
905  
906  
907  
908  
909  
910  
911  
912  
913  
914  
915  
916  
917  
918  
919  
920  
921  
922  
923  
924  
925  
926  
927  
928  
929  
930  
931  
932  
933  
934  
935  
936  
937  
938  
939  
940  
941  
942  
943  
944  
945  
946  
947  
948  
949  
950  
951  
952  
953  
954  
955  
956  
957  
958  
959  
960  
961  
962  
963  
964  
965  
966  
967  
968  
969  
970  
971  
972  
973  
974  
975  
976  
977  
978  
979  
980  
981  
982  
983  
984  
985  
986  
987  
988  
989  
990  
991  
992  
993  
994  
995  
996  
997  
998  
999  
1000

42 *The GP Intervention*

43  
44 A GP education resource card, 'The Rural Cancer Initiative: a Guide for General  
45 Practitioners', has been developed with input from rural GPs and health professional  
46 advisors. The novel aspect of this intervention is the implementation of the CAPER risk  
47 assessment charts for colorectal,(21) lung(20) and prostate(22) cancer. The resource card  
48 contains the clinical implications of these risk charts including diagnostic assessment. In  
49 addition the resource card summarises the National Breast and Ovarian Cancer Centre  
50 guidelines for investigating new breast symptoms (39) and local referral guidelines and  
51 hospital contacts, including recommendations about access to cancer multidisciplinary  
52 teams.(40)  
53  
54  
55  
56  
57  
58  
59  
60

1  
2  
3  
4  
5 The GP resource card is being implemented through a series of four academic detailing  
6 practice visits, supplemented by a series of question-and-answer case studies for  
7 completion between visits designed to reinforce key messages.(41) The practice visits  
8 present specific components of the resource card and facilitate discussion within the  
9 practice around recently diagnosed cancer patients. GPs are eligible for Royal Australian  
10 College of General Practitioners and Australian College of Rural and Remote Medicine  
11 professional development points on completion of the case studies and attendance at  
12 practice visits.  
13  
14  
15  
16  
17  
18  
19

## 20 **Outcomes and Measures**

### 21 **Primary Outcome**

22  
23  
24  
25 The primary outcome is the Total Diagnostic Interval, defined as the time from first  
26 symptom to diagnosis. We will report our time intervals according to the principles outlined  
27 in the 'Aarhus Statement' on the conduct and reporting of research on cancer diagnosis,(29)  
28 and will use the *Model of Pathways to Treatment* as our theoretical framework.(30, 31)  
29 The date of first symptom is defined as '*the time-point when first bodily change(s) and/or*  
30 *symptom(s) is noticed*'. For screen-detected cases we use the date of attendance for the  
31 screening test as the initial date in the patient pathway. Date of diagnosis is based on  
32 pathological diagnosis as reported to the WA Cancer Registry. We will divide the Total  
33 Diagnostic Interval further to include time from first presentation in general practice to  
34 referral (GP Interval), date of referral to first attendance at specialist (Specialist Access  
35 Interval), and time from first attendance at the specialist to date of diagnosis (Specialist  
36 Interval).(42) The GP Interval includes the time taken to order and respond to investigations  
37 available directly in primary care. For patient-reported dates we will apply published mid-  
38 point rules to estimate the actual date where uncertainty exists.(12) Where necessary, a  
39 clinical consensus group will review the data to confirm the date of first symptom and first  
40 presentation to healthcare.  
41  
42  
43  
44  
45  
46  
47  
48  
49  
50  
51  
52

#### 53 *Measurement tools*

54  
55 The following instruments will be used to obtain information about symptoms and key dates  
56 to calculate the Total Diagnostic Interval:  
57  
58  
59  
60

1  
2  
3  
4  
5  
6  
7  
8  
9  
10  
11  
12  
13  
14  
15  
16  
17  
18  
19  
20  
21  
22  
23  
24  
25  
26  
27  
28  
29  
30  
31  
32  
33  
34  
35  
36  
37  
38  
39  
40  
41  
42  
43  
44  
45  
46  
47  
48  
49  
50  
51  
52  
53  
54  
55  
56  
57  
58  
59  
60

### 1. SYMPTOM Questionnaire

This self-administered questionnaire was developed from the C-SIM(43) measure and has been applied in the UK SYMPTOM study.(44) It includes items specific to each tumour site to capture details of symptoms, their date of onset and time taken to seek help.

### 2. GP record audit tool

This tumour-specific proforma is mailed to the participant's GP to obtain key information on: the date, type and duration of presenting symptoms within the last 12 months, referral information including referral date, and date of first appointment with specialist.

Date of cancer diagnosis is obtained from the WA Cancer Registry.

## Secondary outcomes

### 1. Process Measures of Intervention Delivery

#### a. Campaign Dose

Process evaluation is conducted in each intervention town to collect data on the amount of media exposure achieved, number of campaign resources distributed, number of partnerships established, and number of presentations, events and other activities carried out by campaign staff to promote the campaign messages. Information is collected via monthly reports by the campaign project officers.

#### b. Media Exposure

Media exposure is measured by number and square centimetre coverage of paid press advertisements and unpaid press articles. The value of unpaid media is estimated by calculating the square centimetre space and calculating the cost to purchase that space.

#### c. GP Monitoring

The campaign project officers document number of visits conducted, GP attendance at each visit, and number of case studies completed.

#### d. Costs of intervention delivery

1  
2  
3 Cost data of delivering the interventions are being collected prospectively (see Health  
4 Economic Evaluation below).  
5  
6  
7  
8

## 9 **2. Impact Measures of Intervention**

10 Campaign awareness is being measured at 18 months into the campaign intervention by a  
11 computer assisted telephone interview survey. The survey is being conducted on a random  
12 sample of adults over 40 years old from the campaign regions and control regions stratified  
13 by sex and age, and regions within Trial Area A. Questions measure exposure to the  
14 campaign, including unprompted and prompted awareness of campaign elements (i.e.  
15 radio, print and campaign brand and logos). Respondents reporting any exposure to the  
16 campaign are asked additional questions about comprehension and perceived effectiveness.  
17  
18  
19  
20  
21  
22  
23  
24  
25  
26

## 27 **3. Measures of Clinical Outcomes**

28 We will use the WA datasets (45) to provide linked hospital morbidity and administrative,  
29 cancer diagnostic and mortality data in order to examine trends across time on clinical  
30 outcomes at the level of the community and individual. We will obtain these data in three  
31 tranches:  
32  
33  
34  
35

- 36 a. Cohort of patients diagnosed in 2002-2010 to provide a baseline understanding of  
37 the patterns of care and survival;
- 38 b. Cohort of patients diagnosed in 2011-2013 with all linked data after at least two  
39 years of follow-up to evaluate short-term clinical effects of the interventions on  
40 cancer stage, health care utilisation and disease free status;
- 41 c. Cohort of patients diagnosed in 2011-2013 with all linked data after at least five  
42 years of follow-up to evaluate medium-term clinical effects and survival.  
43  
44  
45  
46  
47  
48

## 49 **Analysis**

50 The cluster randomised design provides protection against contamination across trial groups  
51 when trial patients are managed within the same setting.(46) The primary analysis will  
52 compare the Total Diagnostic Intervals and its sub-components between trial groups.  
53 Simple analyses such as t-tests or more complex regression analyses will be undertaken.  
54  
55  
56  
57  
58  
59  
60



1  
2  
3 Time data are invariably skewed and bounded by the absence of negative times. We will  
4 apply a log transformation prior to conducting general linear modelling to compare intervals  
5 accounting for exposure to the community and GP interventions within the model,  
6 accounting for clustering effects at the practice level. Where appropriate, comparisons of  
7 arithmetic or geometric means will be performed. The aim of statistical modelling is to  
8 identify the main factors that explain variation in the outcome e.g. patient and practice  
9 characteristics. The primary aim is to adjust for the effect of covariates before the effect of  
10 the intervention is tested as well as 'intervention × phase' interaction with pre- and post-  
11 measurements comparison. We will conduct a series of sensitivity analyses to account for:

- 12 a. symptoms reported with a duration of greater than two years which will be excluded  
13 from the primary analysis.
- 14 b. vague first symptoms such as fatigue and 'feeling different'.

15 Using cancer registry, hospital morbidity and death data we will compare patterns of  
16 hospitalisation and treatment, pseudo-staging at diagnosis using established methods  
17 where full staging data are not available(45, 47-50), disease-free intervals and survival in  
18 people diagnosed with breast, lung, colorectal or prostate cancer resident in Trial Area A  
19 with those in Area B and those resident elsewhere in non-metropolitan and metropolitan  
20 WA. The comparisons will relate to patients diagnosed with one of the four target cancers  
21 in the six years prior to the interventions (2005-2010) and during the two years of  
22 intervention (late 2011 – late 2013). This will enable the effects of the community-level  
23 intervention to be evaluated as a spatial contrast. The same analyses will be conducted  
24 after five-years of follow-up. These analyses will entail all cancer patients in WA during the  
25 specific time periods to assess the effects of the community intervention. In addition, we  
26 will conduct analyses of all consented trial participants to measure the effects of exposure  
27 to the GP intervention and combined effect of community and GP interventions on clinical  
28 outcomes at two and five years.

29 All analyses will be conducted by trial statisticians blinded to participant allocation.

#### 4. *Health economic evaluation*

A health economic evaluation from a health system perspective will be undertaken to determine whether the resources committed to the trial between the four intervention arms represent a worthwhile investment in terms of the measured outcomes. This will include a cost-analysis of each intervention and a cost-effectiveness analysis which will compare costs with related outcomes. Cost components include : campaign intervention costs (e.g. staffing, travel, campaign resources, media, events, in-kind support); GP intervention costs (e.g. staffing, travel, education program, resources); additional staff costs; non-intended costs of non-cancer diagnoses (hospital utilisation); in-kind personnel contributions from project partners. Resource units and cost per unit will be applied to calculate total cost.

Outcome data will be matched to cost data. In the first instance, cost per change in TDI will be calculated for each of the four arms of the trial. Longer term cost-effectiveness will also be calculated to estimate net cost per life year gained for each intervention. The TDI will provide a surrogate outcome for longer term outcomes using modelling techniques. Once longer term follow-up data are available, cost-effectiveness ratios will be calculated.

#### **Sample Size**

The original sample size required for 80% power and  $\alpha=0.05$  to detect a halving of long-delay risk of 30% to 15% was 840 participants. This sample size calculation accounted for the design effects from hierarchical correlations and an intra-class correlation coefficient of 0.09 based on similar trial designs.(51)

Recruitment was planned to continue until four months after completion of intervention delivery to allow inclusion of a cohort of newly diagnosed cancer patients who were exposed to the interventions (i.e 31 March 2014). We have achieved approximately a 50% accrual rate into the trial which was much higher than our original estimates. Our final estimated recruitment is 1,359 participants. Based on the distributions of TDIs) from our previous research, (18,(35) this sample will provide 80% power to detect a 10% difference in TDI between intervention groups for all four cancers combined, and a 20% difference in TDI

1  
2  
3 for breast, colorectal and prostate cancer separately, but not lung cancer as this would  
4 require a sample of 2,600 participants.  
5  
6  
7  
8

## 9 **Ethical Considerations**

10  
11 The trial obtained primary ethics approval from The University of Western Australia's  
12 Human Research Ethics Committee (RA/4/1/4527). Additional approval was gained through  
13 the Department of Health of Western Australia's ethics committee, as well as reciprocal  
14 approvals with relevant metropolitan and regional hospitals.  
15  
16  
17  
18

## 19 **Funding**

20  
21 The project is funded by a National Health Medical Research Council (NHMRC) Partnership  
22 Grant (Grant ID 572765) and the AH Crawford Society. The project is a partnership with  
23 Cancer Council Western Australia, the WA Cancer and Palliative Care Network, and the  
24 Department of Health Western Australia.  
25  
26  
27  
28  
29  
30  
31

## 32 **Dissemination**

33  
34 This is the first randomised controlled trial to test the individual and combined effects of a  
35 community awareness campaign and GP intervention on time to cancer diagnosis. We plan  
36 to publish the main trial outcomes in a single paper and anticipate publishing additional  
37 papers exploring the data in more detail and relating to the implementation of this complex  
38 intervention. We will present the findings at national and international conferences from  
39 late 2014.  
40  
41  
42  
43  
44  
45  
46  
47

## 48 **Authors contributions**

49  
50 JDE, CDJH, CS, KA, AN, FMW, MB conceptualised and designed the study. All authors  
51 assisted with the development of the protocol, study design and refinement of study  
52 materials. All authors will contribute to implementation of the protocol and acquisition of  
53 data. JDE, VG and CDJH led the writing of the protocol. All authors have been involved in  
54  
55  
56  
57  
58  
59  
60

1  
2  
3 drafting and critical evaluation of the manuscript. All authors have read and approved the  
4 final version.  
5  
6  
7

### 8 *Conflicts of interest*

9  
10 None declared  
11  
12

### 13 *Acknowledgements*

14  
15 *We wish to thank the following for their contributions to this trial: Find Cancer Early Project*  
16 *Officers (Lisa Barr, Pam Foulkes-Taylor, Libby Foster, Karen Hansen, Amanda Harding, Kerryn*  
17 *Keating, Tracey Price, Jo Woodall), Cancer Council WA staff and associated staff, Cancer*  
18 *Council WA Lodges, participants, GPs and Hospital specialists, Cancer Research UK, AH*  
19 *Crawford Treatment Society, Department of Health WA, WA Cancer and Palliative Care*  
20 *Network, WA Country Health Service, National Health and Medical Research Council, Cancer*  
21 *and Palliative Care Research and Evaluation Unit, Val Lishman Health Research Foundation,*  
22 *WA Cancer Registry Staff, WA Data Linkage Branch, Pat Booth, Rhonda Coleman, Hooi Ee,*  
23 *Dickon Hayne, Laura Keith, Andrew Kirke, Mike Mears, Leanne Monterosso, Violet Platt, Iain*  
24 *Steve Pratt, David Preen, Babu Simon, Craig Sinclair, Hayley Staples, Simon Towler, Clare*  
25 *Willix.*  
26  
27  
28  
29  
30  
31  
32  
33  
34  
35  
36  
37

### 38 **References**

- 39  
40 1. Underhill CR, Goldstein D, Grogan PB. *Inequity in rural cancer survival in Australia is not an*  
41 *insurmountable problem. The Medical journal of Australia.* 2006 Nov 6;185(9):479-80. PubMed  
42 PMID: 17137450. Epub 2006/12/02. eng.  
43 2. AIHW. *Cancer in Australia 2010: an overview.* Canberra: Australian Institute of Health and  
44 Welfare, 2010.  
45 3. Coleman MP, Forman D, Bryant H, Butler J, Rachet B, Maringe C, et al. *Cancer survival in*  
46 *Australia, Canada, Denmark, Norway, Sweden, and the UK, 1995-2007 (the International Cancer*  
47 *Benchmarking Partnership): an analysis of population-based cancer registry data. Lancet.* 2011 Jan  
48 8;377(9760):127-38. PubMed PMID: 21183212. Pubmed Central PMCID: PMC3018568. Epub  
49 2010/12/25. eng.  
50 4. Butler J, Foot C, Bomb M, Hiom S, Coleman M, Bryant H, et al. *The International Cancer*  
51 *Benchmarking Partnership: An international collaboration to inform cancer policy in Australia,*  
52 *Canada, Denmark, Norway, Sweden and the United Kingdom. Health policy (Amsterdam,*  
53 *Netherlands).* 2013;112(1):148-55.  
54 5. Hall SE, Holman CD, Wisniewski ZS, Semmens J. *Prostate cancer: socio-economic,*  
55 *geographical and private-health insurance effects on care and survival. BJU international.* 2005  
56 Jan;95(1):51-8. PubMed PMID: 15638894. Epub 2005/01/11. eng.  
57  
58  
59  
60

6. Baade PD, Youlden DR, Coory MD, Gardiner RA, Chambers SK. Urban-rural differences in prostate cancer outcomes in Australia: what has changed? *The Medical journal of Australia*. 2011 Mar 21;194(6):293-6. PubMed PMID: 21426283. Epub 2011/03/24. eng.
7. Coory MD, Baade PD. Urban-rural differences in prostate cancer mortality, radical prostatectomy and prostate-specific antigen testing in Australia. *The Medical journal of Australia*. 2005 Feb 7;182(3):112-5. PubMed PMID: 15698354. Epub 2005/02/09. eng.
8. Mitchell KJ, Fritschi L, Reid A, McEvoy SP, Ingram DM, Jamrozik K, et al. Rural-urban differences in the presentation, management and survival of breast cancer in Western Australia. *Breast*. 2006 Dec;15(6):769-76. PubMed PMID: 16765049. Epub 2006/06/13. eng.
9. Department of Health and Ageing. *Delivering Regional Cancer Centres*. Canberra, Australia: Department of Health and Ageing, 2010.
10. Jong KE, Vale PJ, Armstrong BK. Rural inequalities in cancer care and outcome. *The Medical journal of Australia*. 2005 Jan 3;182(1):13-4. PubMed PMID: 15651940. Epub 2005/01/18. eng.
11. Baade PD, Dasgupta P, Aitken J, Turrell G. Geographic remoteness and risk of advanced colorectal cancer at diagnosis in Queensland: a multilevel study. *British journal of cancer*. 2011 Sep 27;105(7):1039-41. PubMed PMID: 21897391. Epub 2011/09/08. eng.
12. Allgar VL, Neal RD. Delays in the diagnosis of six cancers: analysis of data from the National Survey of NHS Patients: Cancer. *British journal of cancer*. 2005 Jun 6;92(11):1959-70. PubMed PMID: 15870714. Pubmed Central PMCID: 2361797. Epub 2005/05/05. eng.
13. Richards MA, Westcombe AM, Love SB, Littlejohns P, Ramirez AJ. Influence of delay on survival in patients with breast cancer: a systematic review. *Lancet*. 1999 Apr 3;353(9159):1119-26. PubMed PMID: 10209974. Epub 1999/04/21. eng.
14. Topping ML, Frydenberg M, Hansen RP, Olesen F, Hamilton W, Vedsted P. Time to diagnosis and mortality in colorectal cancer: a cohort study in primary care. *British journal of cancer*. 2011 Mar 15;104(6):934-40. PubMed PMID: 21364593. Pubmed Central PMCID: 3065288. Epub 2011/03/03. eng.
15. Cancer Research UK. *About the National Awareness and Early Diagnosis Initiative UK: Cancer Research UK*; 2010 [cited 2014]. Available from: <http://www.cancerresearchuk.org/cancer-info/spotcancerearly/naedi/AboutNAEDI/>.
16. Austoker J, Bankhead C, Forbes LJ, Atkins L, Martin F, Robb K, et al. Interventions to promote cancer awareness and early presentation: systematic review. *Br J Cancer*. 2009 Dec 3;101 Suppl 2:S31-9. PubMed PMID: 19956160. Pubmed Central PMCID: PMC2790702. Epub 2009/12/04. eng.
17. Athey VL, Suckling RJ, Tod AM, Walters SJ, Rogers TK. Early diagnosis of lung cancer: evaluation of a community-based social marketing intervention. *Thorax*. 2012 May;67(5):412-7. PubMed PMID: 22052579. Epub 2011/11/05. eng.
18. Emery JD, Walter FM, Gray V, Sinclair C, Howting D, Bulsara M, et al. Diagnosing cancer in the bush: a mixed-methods study of symptom appraisal and help-seeking behaviour in people with cancer from rural Western Australia. *Family practice*. 2013 Jun;30(3):294-301. PubMed PMID: 23363540. Epub 2013/02/01. eng.
19. Hamilton W. The CAPER studies: five case-control studies aimed at identifying and quantifying the risk of cancer in symptomatic primary care patients. *Br J Cancer*. 2009 Dec 3;101 Suppl 2:S80-6. PubMed PMID: 19956169. Pubmed Central PMCID: PMC2790706. Epub 2009/12/04. eng.
20. Hamilton W, Peters TJ, Round A, Sharp D. What are the clinical features of lung cancer before the diagnosis is made? A population based case-control study. *Thorax*. 2005 December 1, 2005;60(12):1059-65.
21. Hamilton W, Round A, Sharp D, Peters TJ. Clinical features of colorectal cancer before diagnosis: a population-based case-control study. *Br J Cancer*. 2005 Aug 22;93(4):399-405. PubMed PMID: 16106247. Pubmed Central PMCID: PMC2361578. Epub 2005/08/18. eng.

22. Hamilton W, Sharp DJ, Peters TJ, Round AP. Clinical features of prostate cancer before diagnosis: a population-based, case-control study. *British Journal of General Practice*. 2006 October 1, 2006;56(531):756-62.
23. Hippisley-Cox J, Coupland C. Symptoms and risk factors to identify women with suspected cancer in primary care: derivation and validation of an algorithm. *The British journal of general practice : the journal of the Royal College of General Practitioners*. 2013 Jan;63(606):e11-21. PubMed PMID: 23336450. Pubmed Central PMCID: PMC3529288. Epub 2013/01/23. eng.
24. Hippisley-Cox J, Coupland C. Symptoms and risk factors to identify men with suspected cancer in primary care: derivation and validation of an algorithm. *The British journal of general practice : the journal of the Royal College of General Practitioners*. 2013 Jan;63(606):e1-10. PubMed PMID: 23336443. Pubmed Central PMCID: PMC3529287. Epub 2013/01/23. eng.
25. F. Khan N. Implementation of a diagnostic tool for symptomatic colorectal cancer in primary care: a feasibility study. *Primary Health Care Research & Development*. 2009;10(01):54-64.
26. Hamilton W, Green T, Martins T, Elliott K, Rubin G, Macleod U. Evaluation of risk assessment tools for suspected cancer in general practice: a cohort study. *The British journal of general practice : the journal of the Royal College of General Practitioners*. 2013 Jan;63(606):e30-6. PubMed PMID: 23336455. Pubmed Central PMCID: PMC3529290. Epub 2013/01/23. eng.
27. Mansell G, Shapley M, Jordan JL, Jordan K. Interventions to reduce primary care delay in cancer referral: a systematic review. *The British journal of general practice : the journal of the Royal College of General Practitioners*. 2011 Dec;61(593):e821-35. PubMed PMID: 22137419. Pubmed Central PMCID: PMC3223780. Epub 2011/12/06. eng.
28. Cockburn J, Pit S, Zorbas H, Redman S. Investigating breast symptoms in primary care: enhancing concordance with current best advice. *Cancer Detection and Prevention*. 2001 /;25(5):407-13.
29. Weller D, Vedsted P, Rubin G, Walter FM, Emery J, Scott S, et al. The Aarhus statement: improving design and reporting of studies on early cancer diagnosis. *British journal of cancer*. 2012 Mar 27;106(7):1262-7. PubMed PMID: 22415239. Pubmed Central PMCID: 3314787. Epub 2012/03/15. eng.
30. Walter F, Webster A, Scott S, Emery J. The Andersen Model of Total Patient Delay: a systematic review of its application in cancer diagnosis. *Journal of health services research & policy*. 2012 Apr;17(2):110-8. PubMed PMID: 22008712. Pubmed Central PMCID: PMC3336942. Epub 2011/10/20. eng.
31. Scott SE, Walter FM, Webster A, Sutton S, Emery J. The model of pathways to treatment: conceptualization and integration with existing theory. *British journal of health psychology*. 2013 Feb;18(1):45-65. PubMed PMID: 22536840. Epub 2012/04/28. eng.
32. Smith LK, Pope C, Botha JL. Patients' help-seeking experiences and delay in cancer presentation: a qualitative synthesis. *Lancet*. 2005 Sep 3-9;366(9488):825-31. PubMed PMID: 16139657. Epub 2005/09/06. eng.
33. Campbell NC, Murray E, Darbyshire J, Emery J, Farmer A, Griffiths F, et al. Designing and evaluating complex interventions to improve health care. *BMJ (Clinical research ed)*. 2007 Mar 3;334(7591):455-9. PubMed PMID: 17332585. Pubmed Central PMCID: PMC1808182. Epub 2007/03/03. eng.
34. Craig P, Dieppe P, Macintyre S, Michie S, Nazareth I, Petticrew M. Developing and evaluating complex interventions: the new Medical Research Council guidance. *BMJ (Clinical research ed)*. 2008;337:a1655. PubMed PMID: 18824488. Pubmed Central PMCID: PMC2769032. Epub 2008/10/01. eng.
35. Emery JD, Walter FM, Gray V, Sinclair C, Howting D, Bulsara M, et al. Diagnosing cancer in the bush: a mixed methods study of GP and specialist diagnostic intervals in rural Western Australia. *Family practice*. 2013 Jun 3. PubMed PMID: 23699107. Epub 2013/05/24. Eng.
36. WA Country Health Service. *Regional Profiles East Perth: WA Country Health Service; 2011 [cited 2014]*. Available from: <http://www.wacountry.health.wa.gov.au/index.php?id=506>.

- 1  
2  
3 37. Australian Bureau of Statistics. 3232.0 Population by Age and Sex, Regions of Australia. Canberra: Australian Bureau of Statistics, 2011.
- 4  
5 38. Adamson J, Cockayne S, Puffer S, Torgerson DJ, Adamson J, Cockayne S, et al. Review of  
6 randomised trials using the post-randomised consent (Zelen's) design. *Contemporary Clinical Trials*.  
7 2006 8;27(4):305-19.
- 8 39. National Breast and Ovarian Cancer Centre. *The investigation of a new breast symptom: a  
9 guide for General Practitioners*. Australia: National Breast and Ovarian Cancer Centre; 2006.
- 10 40. Department of Health WA. *Model of Care for Cancer*. Perth WA Cancer and Palliative Care  
11 Network, Department of Health, Western Australia.; 2008.
- 12 41. Grimshaw JM, Thomas RE, MacLennan G, Fraser C, Ramsay CR, Vale L, et al. Effectiveness  
13 and efficiency of guideline dissemination and implementation strategies. *Health technology  
14 assessment (Winchester, England)*. 2004 Feb;8(6):iii-iv, 1-72. PubMed PMID: 14960256. Epub  
15 2004/02/13. eng.
- 16 42. Olesen F, Hansen RP, Vedsted P. Delay in diagnosis: the experience in Denmark. *British  
17 journal of cancer*. 2009 Dec 3;101 Suppl 2:S5-8. PubMed PMID: 19956163. Pubmed Central PMCID:  
18 2790711. Epub 2009/12/04. eng.
- 19 43. Neal RD, Nafees S, Pasterfield D, Hood K, Hendry M, Gollins S, et al. Patient-reported  
20 measurement of time to diagnosis in cancer: development of the Cancer Symptom Interval Measure  
21 (C-SIM) and randomised controlled trial of method of delivery. *BMC health services research*.  
22 2014;14:3. PubMed PMID: 24387663. Pubmed Central PMCID: PMC3922822. Epub 2014/01/07. eng.
- 23 44. Discovery Programme. *The Symptom Study United Kingdom: Discovery Programme*; 2014  
24 [cited 2014]. Available from: [http://discovery-programme.org/symptom\\_study.php](http://discovery-programme.org/symptom_study.php).
- 25 45. Department of Health WA. *Data linkage WA Perth: Department of Health, Western Australia*;  
26 2014 [cited 2014]. Available from: <http://www.datalinkage-wa.org.au/>.
- 27 46. Campbell MK, Mollison J, Steen N, Grimshaw JM, Eccles M. Analysis of cluster randomized  
28 trials in primary care: a practical approach. *Family practice*. 2000 April 1, 2000;17(2):192-6.
- 29 47. Yuen E, Louis D, Cisbani L, Rabinowitz C, De Palma R, Maio V, et al. Using administrative data  
30 to identify and stage breast cancer cases: implications for assessing quality of care. *Tumori*. 2011 Jul-  
31 Aug;97(4):428-35. PubMed PMID: 21989429. Epub 2011/10/13. eng.
- 32 48. Cooper GS, Yuan Z, Stange KC, Amini SB, Dennis LK, Rimm AA. The utility of Medicare claims  
33 data for measuring cancer stage. *Medical care*. 1999 Jul;37(7):706-11. PubMed PMID: 10424641.  
34 Epub 1999/07/29. eng.
- 35 49. Thompson B, Lumley J, Coory M. Hospital morbidity data for determining spread of disease at  
36 diagnosis for colorectal cancer: a validation study. *Asia-Pacific journal of clinical oncology*. 2012  
37 Sep;8(3):e17-22. PubMed PMID: 22898060. Epub 2012/08/18. eng.
- 38 50. Thompson B, Watson M, Bowman R, Fong K, Coory M. Hospital-activity data inaccurate for  
39 determining spread-of-disease at diagnosis for non-small cell lung cancer. *Australian and New  
40 Zealand journal of public health*. 2012 Jun;36(3):212-7. PubMed PMID: 22672025. Epub 2012/06/08.  
41 eng.
- 42 51. Campbell MK, Thomson S, Ramsay CR, MacLennan GS, Grimshaw JM. Sample size calculator  
43 for cluster randomized trials. *Computers in biology and medicine*. 2004 Mar;34(2):113-25. PubMed  
44 PMID: 14972631. Epub 2004/02/20. eng.
- 45  
46  
47  
48  
49  
50  
51  
52  
53  
54  
55  
56  
57  
58  
59  
60

1  
2  
3  
4  
5  
6  
7  
8  
9  
10  
11  
12  
13  
14  
15  
16  
17  
18  
19  
20  
21  
22  
23  
24  
25  
26  
27  
28  
29  
30  
31  
32  
33  
34  
35  
36  
37  
38  
39  
40  
41  
42  
43  
44  
45  
46  
47  
48  
49  
50  
51  
52  
53  
54  
55  
56  
57  
58  
59  
60

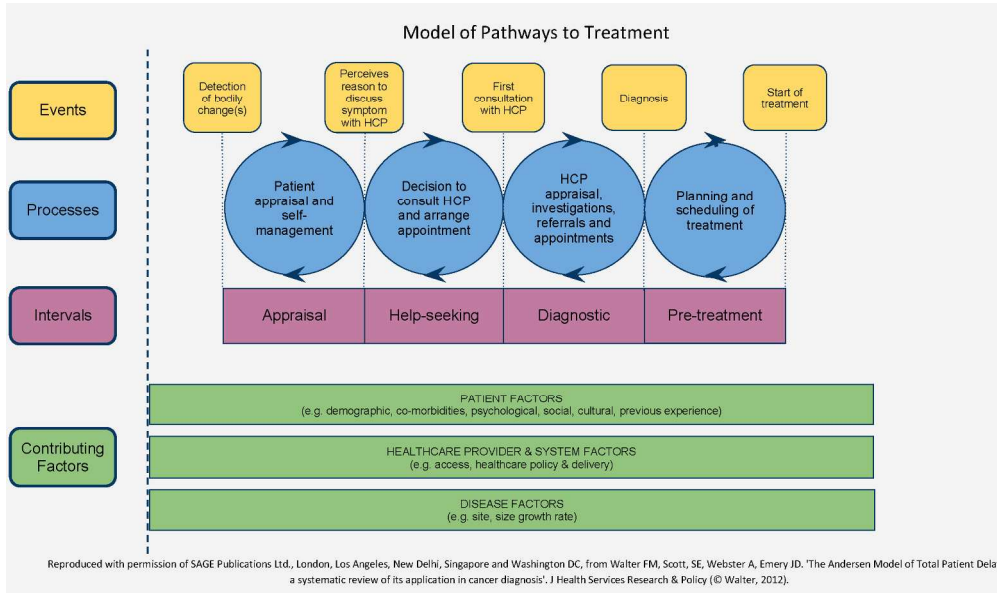

Model of Pathways to Treatment (30, 31)  
320x188mm (200 x 200 DPI)

review only



1  
2  
3  
4  
5  
6  
7  
8  
9  
10  
11  
12  
13  
14  
15  
16  
17  
18  
19  
20  
21  
22  
23  
24  
25  
26  
27  
28  
29  
30  
31  
32  
33  
34  
35  
36  
37  
38  
39  
40  
41  
42  
43  
44  
45  
46  
47  
48  
49  
50  
51  
52  
53  
54  
55  
56  
57  
58  
59  
60

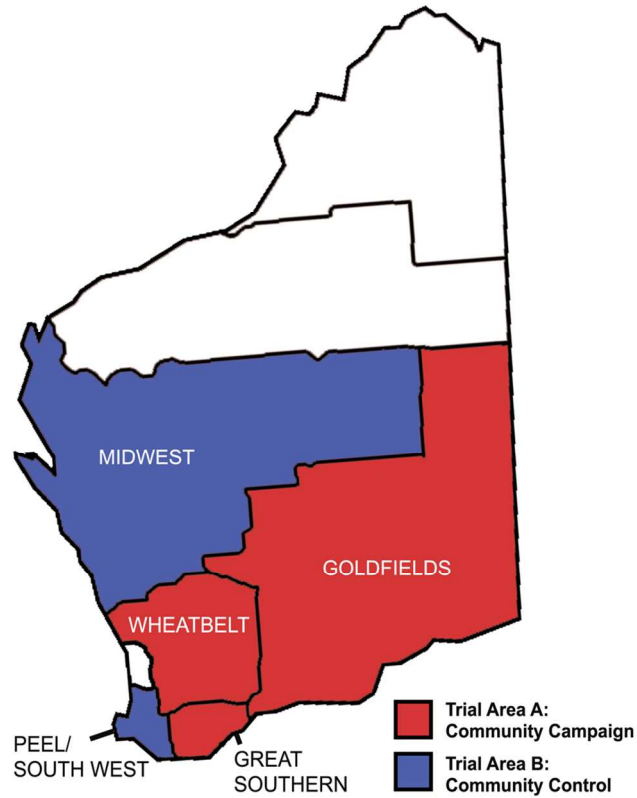

Map of Western Australia depicting the regional boundaries of Trial Area A, receiving the community intervention, and Trial Area B, acting as the community control.

104x147mm (300 x 300 DPI)

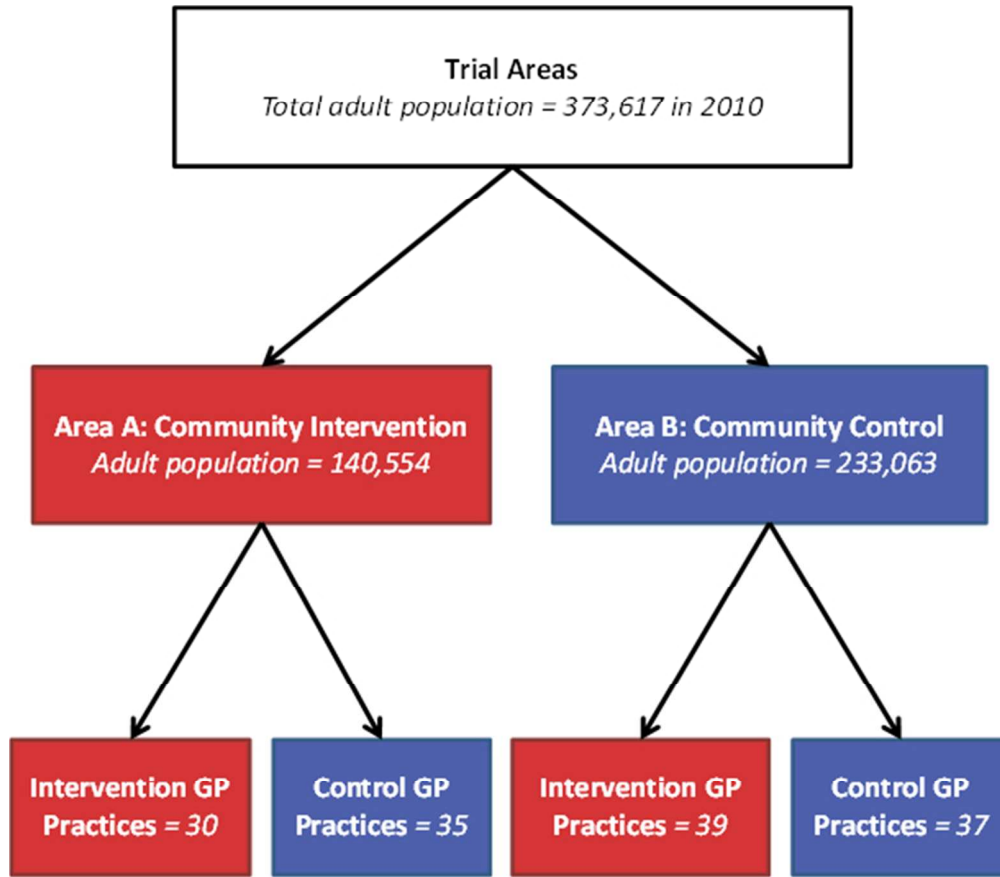

The 2x2 factorial cluster randomised controlled trial design.(37)  
215x188mm (72 x 72 DPI)

For peer review only

1  
2  
3  
4  
5  
6  
7  
8  
9  
10  
11  
12  
13  
14  
15  
16  
17  
18  
19  
20  
21  
22  
23  
24  
25  
26  
27  
28  
29  
30  
31  
32  
33  
34  
35  
36  
37  
38  
39  
40  
41  
42  
43  
44  
45  
46  
47  
48  
49  
50  
51  
52  
53  
54  
55  
56  
57  
58  
59  
60

**General Symptom Checklist**

**Are you over 40?**  
Have you had any of these...

**... for more than 4 weeks?**

- Blood in your poo
- Problems peeing
- Looser poo
- Unexplained weight loss
- An unusual pain, lump or swelling anywhere in your body
- Becoming more short of breath
- A persistent cough

**... once off?**

- Coughing up blood
- Blood in your pee

**If you have...  
Tell your doctor**

The earlier cancer is found, the greater the chance of successful treatment.

**Find Cancer Early**  
Cancer Council Helpline 13 11 20  
Cancer Council

For more information visit: [www.findcancerearly.com.au](http://www.findcancerearly.com.au)

**Prostate Symptom Postcard (Front and Back)**

**Front:** "How's the ute? How's the Mrs? How's the waterworks?"  
If your peeing is causing you problems, tell your doctor.

**Back:** Tell your doctor if you have any of these symptoms:

- If you ever find blood in your pee
- Waking frequently at night to pee
- Sudden or urgent need to pee
- Difficulty starting or stopping peeing
- Slow flow
- Pain when you pee
- Unexplained weight loss

These symptoms might be due to prostate cancer and the earlier it's found, the greater the chance of successful treatment.

For more information visit: [www.findcancerearly.com.au](http://www.findcancerearly.com.au)

**Tell your doctor Postcard (Front and Back)**

**Front:** Your doctor is never too busy to see you.  
Tell your doctor about any changes with your body, no matter how small or how often they occur.

**Back:** Tell your doctor - if you notice any of the possible symptoms of cancer.

Lots of questions and concerns may pass through your mind when you decide to see your doctor.

|                                                                                                         |                                                                                                                    |
|---------------------------------------------------------------------------------------------------------|--------------------------------------------------------------------------------------------------------------------|
| <b>Excuse</b>                                                                                           | <b>Fact</b>                                                                                                        |
| <input checked="" type="checkbox"/> The doctor is always too busy, it's too hard to get an appointment. | <input checked="" type="checkbox"/> Phoning early in the morning can help.                                         |
| <input checked="" type="checkbox"/> When I get to the doctor's my mind goes blank.                      | <input checked="" type="checkbox"/> Writing a list jogs your memory.                                               |
| <input checked="" type="checkbox"/> I'm worried about what might happen when I see the doctor.          | <input checked="" type="checkbox"/> The doctor might examine you, reassure you, and/or arrange tests or refer you. |

For more useful tips visit: [www.findcancerearly.com.au](http://www.findcancerearly.com.au)

Examples of Find Cancer Early resources – General Symptom Checklist, Prostate postcard and Tell your doctor postcard.  
209x147mm (300 x 300 DPI)

Review only

# BMJ Open

## The Improving Rural Cancer Outcomes (IRCO) Trial: a factorial cluster-randomised controlled trial of a complex intervention to reduce time to diagnosis in rural cancer patients in Western Australia: study protocol.

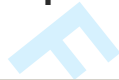

|                                 |                                                                                                                                                                                                                                                                                                                                                                                                                                                                                                                                                                                                                                                                                                                                                                                                                                                                                                                                                                                                                                                                                                                                                                                                          |
|---------------------------------|----------------------------------------------------------------------------------------------------------------------------------------------------------------------------------------------------------------------------------------------------------------------------------------------------------------------------------------------------------------------------------------------------------------------------------------------------------------------------------------------------------------------------------------------------------------------------------------------------------------------------------------------------------------------------------------------------------------------------------------------------------------------------------------------------------------------------------------------------------------------------------------------------------------------------------------------------------------------------------------------------------------------------------------------------------------------------------------------------------------------------------------------------------------------------------------------------------|
| Journal:                        | <i>BMJ Open</i>                                                                                                                                                                                                                                                                                                                                                                                                                                                                                                                                                                                                                                                                                                                                                                                                                                                                                                                                                                                                                                                                                                                                                                                          |
| Manuscript ID:                  | bmjopen-2014-006156.R1                                                                                                                                                                                                                                                                                                                                                                                                                                                                                                                                                                                                                                                                                                                                                                                                                                                                                                                                                                                                                                                                                                                                                                                   |
| Article Type:                   | Protocol                                                                                                                                                                                                                                                                                                                                                                                                                                                                                                                                                                                                                                                                                                                                                                                                                                                                                                                                                                                                                                                                                                                                                                                                 |
| Date Submitted by the Author:   | 28-Aug-2014                                                                                                                                                                                                                                                                                                                                                                                                                                                                                                                                                                                                                                                                                                                                                                                                                                                                                                                                                                                                                                                                                                                                                                                              |
| Complete List of Authors:       | Emery, Jon; University of Melbourne, General Practice and Primary Care Academic Centre<br>Gray, Victoria; The University of Western Australia, School of Population Health<br>Walter, Fiona; University of Cambridge, Dept of Public Health and Primary Care<br>Cheetham, Shelley; The University of Western Australia, School of Primary, Aboriginal and Rural Health Care<br>Croager, Emma; Cancer Council Western Australia, Education and Research; Curtin University, Centre for Behavioural Research and Cancer Control<br>Slevin, Terry; Cancer Council WA, Education and Research<br>Saunders, Christobel; The University of Western Australia, School of Surgery<br>Threlfall, Timothy; The Department of Health of Western Australia, Western Australian Cancer Registry<br>Auret, Kirsten; The University of Western Australia, Rural Clinical School of Western Australia<br>Nowak, Anna; Sir Charles Gairdner Hospital, Department of Medical Oncology<br>Geelhoed, Elizabeth; The University of Western Australia, School of Population Health<br>Bulsara, Max; University of Notre Dame, Biostatistics<br>Holman, Darcy; The University of Western Australia, School of Population Health |
| <b>Primary Subject Heading</b>: | Health services research                                                                                                                                                                                                                                                                                                                                                                                                                                                                                                                                                                                                                                                                                                                                                                                                                                                                                                                                                                                                                                                                                                                                                                                 |
| Secondary Subject Heading:      | General practice / Family practice, Oncology, Public health, Research methods                                                                                                                                                                                                                                                                                                                                                                                                                                                                                                                                                                                                                                                                                                                                                                                                                                                                                                                                                                                                                                                                                                                            |
| Keywords:                       | Epidemiology < ONCOLOGY, Health policy < HEALTH SERVICES ADMINISTRATION & MANAGEMENT, MEDICAL EDUCATION & TRAINING, PRIMARY CARE, PUBLIC HEALTH                                                                                                                                                                                                                                                                                                                                                                                                                                                                                                                                                                                                                                                                                                                                                                                                                                                                                                                                                                                                                                                          |
|                                 |                                                                                                                                                                                                                                                                                                                                                                                                                                                                                                                                                                                                                                                                                                                                                                                                                                                                                                                                                                                                                                                                                                                                                                                                          |

1  
2  
3  
4  
5  
6  
7  
8  
9  
10  
11  
12  
13  
14  
15  
16  
17  
18  
19  
20  
21  
22  
23  
24  
25  
26  
27  
28  
29  
30  
31  
32  
33  
34  
35  
36  
37  
38  
39  
40  
41  
42  
43  
44  
45  
46  
47  
48  
49  
50  
51  
52  
53  
54  
55  
56  
57  
58  
59  
60

SCHOLARONE™  
Manuscripts

For peer review only

1  
2  
3  
4 **The Improving Rural Cancer Outcomes (IRCO) Trial: a**  
5 **factorial cluster-randomised controlled trial of a complex**  
6 **intervention to reduce time to diagnosis in rural cancer**  
7 **patients in Western Australia: study protocol.**  
8  
9  
10  
11  
12  
13

14  
15 Jon D Emery, Victoria Gray, Fiona M Walter, Shelley Cheetham, Emma J Croager, Terry  
16 Slevin, Christobel Saunders, Tim Threlfall, Kirsten Auret, Anna K Nowak, Elizabeth Geelhoed,  
17 Max Bulsara, C D'Arcy J Holman  
18  
19

20  
21  
22 Jon D Emery: General Practice and Primary Health Care Academic Centre, Melbourne  
23 Medical School, The University of Melbourne, Melbourne. Australia. School of Primary,  
24 Aboriginal and Rural Health Care, The University of Western Australia, Crawley, Australia;

25 Victoria Gray: School of Primary, Aboriginal and Rural Health Cancer, The University of  
26 Western Australia, Crawley, Australia; School of Population Health, The University of  
27 Western Australia, Crawley, Australia; Education and Research Division, Cancer Council  
28 Western Australia, Australia.  
29

30 Fiona Walter: The Primary Care Unit, Department of Public Health & Primary Care,  
31 University of Cambridge, UK.  
32

33 Shelley Cheetham: School of Primary, Aboriginal and Rural Health Cancer, The University of  
34 Western Australia, Crawley, Australia  
35

36 Emma J Croager: Education & Research Division, Cancer Council Western Australia; Centre  
37 for Behavioural Research in Cancer Control, Curtin University  
38

39 Terry Slevin: Education & Research Division, Cancer Council Western Australia; Centre for  
40 Behavioural Research in Cancer Control, Curtin University, Australia  
41

42 Christobel Saunders: School of Surgery, The University of Western Australia.  
43

44 Timothy Trelfall: Western Australia Cancer Registry, The Department of Health of Western  
45 Australia, Australia.  
46

47 Kirsten Auret – Rural Clinical School of WA, The University of Western Australia, Australia.  
48

49 Anna K Nowak: School of Medicine and Pharmacology, The University of Western Australia,  
50 Crawley, Australia AND Department of Medical Oncology, Sir Charles Gairdner Hospital,  
51 Perth, Western Australia.  
52

53 Elizabeth Geelhoed: School of Population Health, The University of Western Australia,  
54 Crawley, Australia  
55

56 Max Bulsara: Institute of Health and Rehabilitation Research, Notre Dame University,  
57 Freemantle, Australia.  
58

59 D'Arcy Holman: School of Population Health, The University of Western Australia, Crawley,  
60 Australia

## ***Abstract***

### *Introduction*

While overall survival for most common cancers in Australia is improving, the rural-urban differential has been widening, with significant excess deaths due to lung, colorectal, breast and prostate cancer in regional Australia. Internationally a major focus on understanding variations in cancer outcomes has been later presentation to healthcare and later diagnosis. Approaches to reducing time to diagnosis of symptomatic cancer include public symptom awareness campaigns and interventions in primary care to improve early cancer detection. This paper reports the protocol of a factorial cluster-randomised trial of community and General Practice (GP) level interventions to reduce the time to diagnosis of cancer in rural Western Australia (WA).

### *Methods and analysis*

The Community Intervention is a symptom awareness campaign tailored for rural Australians delivered through a community engagement model. The GP intervention includes a resource card with symptom risk assessment charts and local referral pathways implemented through multiple academic detailing visits and case studies. Participants are eligible if recently diagnosed with breast, colorectal, lung or prostate cancer who reside in specific regions of rural WA with a planned sample size of 1,350. The primary outcome is the Total Diagnostic Interval, defined as the duration from first symptom (or date of cancer screening test) to cancer diagnosis. Secondary outcomes include cancer stage, healthcare utilisation, disease-free status, survival at two and five years and cost-effectiveness.

### *Ethics and dissemination*

Ethics approval has been granted by the University of Western Australia and from all relevant hospital recruitment sites in Western Australia. Results of this trial will be reported in peer-reviewed publications and in conference presentations.

### *Registration details*

Australian New Zealand Clinical Trials Registry (ANZCTR). ACTRN12610000872033

### *Strengths and limitations*

- This is the first large scale RCT to test the implementation of cancer risk tools based on the Hamilton CAPER studies. It is also novel in that it will measure the effect of separate and combined community and GP interventions on time to cancer diagnosis.
- Longer term follow-up will assess the impact on survival.
- The community control area was matched as closely as possible within the constraints of the population distribution in different regions of Western Australia.

## **Background**

Rural Australians are more likely to die within 5 years of a cancer diagnosis than people from metropolitan areas.(1) While overall survival for most common cancers in Australia is improving, the rural-urban differential has been widening, with significant excess deaths due to lung, colorectal, breast and prostate cancer in regional Australia.(2) Similar disparities in cancer outcomes across certain patient groups have been described worldwide.(3) As part of the International Cancer Benchmarking Partnership, a major focus on understanding variations in cancer outcomes has been later presentation to healthcare and later diagnosis.(4)

Previous studies have shown that patients living in rural Australia are less likely to receive curative or reconstructive surgery, radiotherapy or anti-cancer drug treatment.(5-8) Policy initiatives have focused, therefore, on reducing disparities in access to treatment.(9) Access to treatment is an important determinant of outcome, but later presentation and stage at diagnosis have also been observed in rural cancer patients.(10, 11) International research suggests that the time taken to appraise symptoms and seek help (so-called 'patient delay') and management in primary care are also key determinants of cancer outcomes.(12) Time to diagnosis is associated with poorer survival for several common cancers.(13, 14)

One of the approaches to reducing later presentation to healthcare has been community symptom awareness campaigns. These have formed a major component of the UK National Awareness and Early Diagnosis Initiative(NAEDI) as part of the policy to improve cancer outcomes.(15) A systematic review of cancer symptom awareness campaigns published in



1  
2  
3 2009 found insufficient evidence about their effect on presentation to healthcare.(16) Since  
4 then further studies have begun to show potential effects on presentation and cancer  
5 diagnoses.(17)  
6  
7

8  
9  
10 A second approach has aimed at improving early recognition of patients in primary care with  
11 symptoms suggestive of cancer. A major challenge for general practitioners (GPs) is that the  
12 symptoms of many cancers are common in the community and overlap with prevalent  
13 benign conditions. GPs need to assess the risk, or diagnostic probability, of an underlying  
14 cancer and determine whether further investigation is justified. Until recently, there was  
15 little epidemiological evidence demonstrating how well symptoms predict risk of an  
16 underlying cancer from primary care populations.(18) Analysis of data in case-control  
17 studies using large UK general practice databases, notably the CAPER (Cancer Prediction in  
18 Exeter) studies(19-22) and Qcancer research(23, 24), has led to significant advances in our  
19 understanding of the epidemiology of cancer symptoms in primary care.  
20  
21  
22  
23  
24  
25  
26  
27

28  
29 The CAPER studies have quantified the risk of individual and paired symptoms, signs and  
30 primary care investigations for a number of cancers including colorectal, lung and prostate.  
31 These have been evaluated as risk assessment tools (RATs) in paper versions(25) and are  
32 currently undergoing evaluation as computerised decision support tools embedded in the  
33 electronic medical records of English general practices.(26) Various interventions including  
34 audit and feedback, educational visits, guidelines and decision support have been tested in  
35 general practice to improve cancer diagnosis.(27) None of the 22 trials included in a  
36 systematic review of interventions to support cancer diagnosis in primary care examined  
37 effects on diagnostic delay, although audit and feedback was shown to improve clinical  
38 management.(28)  
39  
40  
41  
42  
43  
44  
45  
46  
47

48  
49 Conducting research in the field of 'diagnostic delay' in cancer has many methodological  
50 challenges. The Aarhus Statement discusses these and provides consensus guidelines on  
51 appropriate definitions and the conduct and reporting of such research.(29) One  
52 recommendation is the application of theoretical models such as The Model of Pathways to  
53 Treatment (30, 31) (Figure 1). This model proposes four key intervals:  
54  
55  
56  
57  
58  
59  
60

- 1  
2  
3 1. The **Appraisal Interval**. The nature of a person's symptoms is one of the most important  
4 factors determining the duration of the Appraisal Interval. Misattribution of symptoms  
5 either to a previous benign or concurrent condition or non-recognition of the  
6 seriousness of symptoms contribute to longer Appraisal Intervals.  
7  
8
- 9  
10 2. The **Help-Seeking Interval**. Various factors may contribute to this interval including  
11 patient factors such as competing events (e.g. holidays), and emotional ones such as  
12 fear. This includes fear of the consultation and examination, or of the diagnosis and  
13 treatment. Access to primary care and sanctioning help-seeking by family or friends, so  
14 that patients do not perceive themselves as wasting the doctor's time, are also  
15 important factors.(32)  
16  
17
- 18 3. The **Diagnostic Interval**. Depending on the healthcare setting this may involve a series  
19 of healthcare visits, referrals and investigations and often represents a complex process.  
20 System factors including the role of primary care as a gatekeeper and access to  
21 investigations and specialist care are key factors determining this interval.  
22  
23
- 24 4. **The Pre-Treatment Interval**. The time from formal cancer diagnosis to initiation of  
25 treatment is also strongly influenced by several healthcare system factors such as access  
26 to staging investigations and specialised treatments.  
27  
28  
29  
30  
31  
32  
33

34  
35 Our research on rural cancer outcomes is applying the well-established Medical Research  
36 Council (MRC) methodological framework for the design and evaluation of complex  
37 interventions.(33, 34) Our initial exploratory mixed-methods study aimed to explore the  
38 context of rural cancer diagnosis in WA and inform the development of our complex  
39 intervention. In summary, in-depth interviews with 66 people recently diagnosed with  
40 breast, lung, prostate or colorectal cancer from regional WA found longer duration of  
41 symptom appraisal for colorectal cancer compared with other cancers. Participants defined  
42 core characteristics of rural Australians as optimism, stoicism and machismo. These  
43 features, as well as poorer access to health care, contributed to later presentation of  
44 cancer.(18) In addition, there were significant overall differences between cancers in terms  
45 of time from presentation in general practice to referral, from GP referral to specialist  
46 appointment, and from specialist appointment to cancer diagnosis. These differences were  
47 due to the nature of presenting symptoms, access to diagnostic tests and multiple visits to  
48 specialists. Breast cancer was diagnosed more quickly because its symptoms are more  
49  
50  
51  
52  
53  
54  
55  
56  
57  
58  
59  
60

1  
2  
3 specific and well recognised by the community, and due to better access to diagnostic tests  
4 and specialist one-stop clinics.(35)  
5  
6  
7

8 These findings contributed to the development of the interventions and design of the  
9 Improving Rural Cancer Outcomes (IRCO) Trial: a factorial cluster-randomised controlled  
10 trial of community-based and general practice-based interventions which aims to reduce  
11 the time to diagnosis in rural patients presenting with prostate, breast, colorectal or lung  
12 cancer in Western Australia.  
13  
14  
15  
16

## 17 18 19 20 **Methods and Trial Design**

### 21 ***Design and setting***

22 This 2x2 factorial cluster randomised controlled trial is set in Western Australia, the largest  
23 Australian state geographically, with a population of 2.29 million (approximately 10% of the  
24 Australian population). Two thirds of the WA population live in metropolitan Perth and the  
25 remainder are widely geographically dispersed. Two Trial Areas were matched for  
26 population size, demographics including age and Aboriginality, and similar cancer incidence ,  
27 based on the most recent available data (from 2006) when the trial was planned (Figure 2  
28 presents more recent data on population size from 2010). Trial Area A comprises the  
29 Wheatbelt (155,256 km<sup>2</sup>), Goldfields (770,488 km<sup>2</sup>) and Great Southern (39,007 km<sup>2</sup>)  
30 regions, and Trial Area B includes the Peel/South West (29,646 km<sup>2</sup>) and MidWest  
31 (470,000km<sup>2</sup>) regions.(36)  
32  
33  
34  
35  
36  
37  
38  
39  
40  
41  
42  
43

### 44 **Randomisation**

45 Trial Area A has been allocated to receive the community symptom awareness campaign  
46 intervention and Trial Area B acts as the community campaign control region. In both Trial  
47 Areas general practices have been randomised to receive the education intervention or  
48 control, stratified by practice size (<=1 GP; 2 to 4 GPs; 5+ GPs). GPs who worked at more  
49 than one practice have been identified, and their practices have been treated as one  
50 practice for the purpose of randomisation to avoid contamination (Figure 3).  
51  
52  
53  
54  
55  
56  
57  
58  
59  
60

1  
2  
3 Practices have been randomly assigned to intervention or control arm using a cluster  
4 version of Zelen's method of post-randomised consent: intervention practices have been  
5 invited to receive the educational package while control practices receive no information  
6 about the trial.<sup>(37)</sup> This enables non-intervention practices to act as true controls by  
7 minimising the Hawthorne effect in a situation where placebo and double blind  
8 experimental conditions are impossible to achieve. The Hawthorne effect occurs when the  
9 researchers' procedures and communications act as interventions in themselves that  
10 change behaviours, such as if the control cluster were to adopt the practices or policies  
11 promoted to the intervention cluster. This would destroy the trial's ability to identify a  
12 benefit of the intervention, if one exists. Furthermore, it allows a pragmatic delivery of the  
13 intervention and measure of its uptake in routine practice. Intervention practices which  
14 decline the invitation to receive the educational package will be analysed on an intention-  
15 to-treat basis. Randomisation has been performed by the trial statistician. As the number of  
16 working GPs in a given practice varies, the randomisation has taken into account practice  
17 size. Each practice has been categorized into: one GP in the practice, 2-4 GPs or five or  
18 more GPs. A random sample proportional to the size of the practice has been used  
19 employing 'samplepps' macro in Stata.  
20  
21  
22  
23  
24  
25  
26  
27  
28  
29  
30  
31  
32  
33  
34  
35  
36

### ***Patient recruitment and inclusion criteria***

37  
38 From 1 March 2012, four months after the interventions commenced, all patients meeting  
39 the following criteria are being invited to contribute their data for the trial:  
40  
41

- 42 • Adults aged over 18 years;
- 43 • Diagnosed with breast, lung, colorectal or prostate cancer between 1 January 2012  
44 and the recruitment end date of 31 March 2014; and
- 45 • Resident of Trial Areas A or B at the time of diagnosis.  
46  
47  
48  
49

### ***Recruitment Strategy***

50  
51 Eligible participants are identified via:  
52  
53  
54  
55  
56  
57  
58  
59  
60

1  
2  
3 1. The WA Cancer Registry (WACR). A letter and participant information sheet is mailed  
4 from the WACR directly to newly diagnosed cancer patients. After three-weeks non  
5 responders are followed up by the research team via phone or mail.  
6  
7

8 2. Cancer Council Western Australia's (CCWA) residential lodges. We approach eligible  
9 patients while staying at CCWA charitable accommodation during their cancer treatment in  
10 Perth. A large proportion of rural cancer patients, especially those receiving radiotherapy or  
11 chemotherapy, reside in one of the lodges for several weeks during their treatment. Eligible  
12 patients receive the same participant information sheet as part of their Lodge Welcome  
13 Pack by the lodge receptionists and are followed up by the research team.  
14  
15

16 Participants are invited to sign a consent form, which includes agreement to access their  
17 medical records, and return it with their completed SYMPTOM questionnaire.  
18  
19  
20  
21  
22

### 23 ***Study Interventions***

24  
25 The Trial includes interventions at two levels: a community symptom awareness campaign  
26 ('the community intervention'); and a GP educational package incorporating symptom risk  
27 assessment charts and referral guidance which is implemented through multiple academic  
28 detailing visits and case studies ('the GP intervention'). Both interventions are being  
29 delivered between 1 November 2011 to 31 December 2013.  
30  
31  
32  
33  
34  
35

#### 36 *The Community Intervention*

37  
38 We modified existing resources developed for The Cancer Research UK 'Spot Cancer Early'  
39 and the UK National Health Service '3 week cough' campaigns to incorporate the findings of  
40 our exploratory mixed-methods study (18,(35), and to make them relevant to a rural  
41 Australian community.  
42  
43  
44

45 Materials have been further modified following three community forums held in the major  
46 towns of the campaign target regions. Feedback was obtained about the campaign logo,  
47 design, choice of images, locally acceptable language, and contact details. The campaign is  
48 named the Find Cancer Early campaign and the materials explicitly use the Cancer Council  
49 WA branding, recognising the strong community support and credibility of this organisation.  
50  
51  
52  
53  
54  
55  
56  
57  
58  
59  
60  
Community members wanted the campaign to focus on the positives associated with early  
detection and the use of simple, non-medical terms when describing symptoms. A  
campaign message development meeting was then held between the project team, social

1  
2  
3 marketing experts and health professionals to develop a framework for the campaign and  
4 message hierarchy.  
5  
6

7  
8 The target of the campaign is men and women over the age of 40; it aims to raise  
9 awareness of the symptoms of bowel, lung, prostate and breast cancer, and to help people  
10 overcome the barriers to seeking medical help. The primary campaign item is a plain-  
11 language symptom checklist (Figure 4). Other materials include: newspaper adverts based  
12 on campaign materials; radio adverts for each of the 4 cancers; tumour-specific postcards  
13 featuring regional images and quotations about relevant symptoms (Figure 4); generic  
14 postcards providing strategies to overcome barriers to seeking help (Figure 4); a DVD  
15 outlining tumour specific symptoms featuring health professionals and regional community  
16 members; an Indigenous version of the symptom checklist; a website; and posters and  
17 banners.  
18  
19  
20  
21  
22  
23  
24  
25  
26

27  
28 Five project officers, with a combined full time equivalent of 3.0, are delivering the  
29 campaign across the three regions of WA in Trial Area A. They use a community  
30 engagement approach building partnerships to deliver and disseminate the campaign  
31 messages with presentations, displays and campaign resource distribution. Paid advertising  
32 and articles in regional newspapers and radio supplement this dissemination strategy.  
33 Television is not being used to avoid contamination in the control area.  
34  
35  
36  
37  
38

#### 39 40 *The GP Intervention*

41  
42 A GP education resource card, 'The Rural Cancer Initiative: a Guide for General  
43 Practitioners', has been developed with input from rural GPs and health professional  
44 advisors. The novel aspect of this intervention is the implementation of the CAPER risk  
45 assessment charts for colorectal,(21) lung(20) and prostate(22) cancer. The resource card  
46 contains the clinical implications of these risk charts including diagnostic assessment. In  
47 addition the resource card summarises the National Breast and Ovarian Cancer Centre  
48 guidelines for investigating new breast symptoms (38) and local referral guidelines and  
49 hospital contacts, including recommendations about access to cancer multidisciplinary  
50 teams.(39)  
51  
52  
53  
54  
55  
56  
57  
58  
59  
60

1  
2  
3 The GP resource card is being implemented through a series of four academic detailing  
4 practice visits, supplemented by a series of question-and-answer case studies for  
5 completion between visits designed to reinforce key messages.(40) The practice visits  
6 present specific components of the resource card and facilitate discussion within the  
7 practice around recently diagnosed cancer patients. GPs are eligible for Royal Australian  
8 College of General Practitioners and Australian College of Rural and Remote Medicine  
9 professional development points on completion of the case studies and attendance at  
10 practice visits.  
11  
12  
13  
14  
15  
16

## 17 18 **Outcomes and Measures**

### 19 20 **Primary Outcome**

21  
22 The primary outcome is the Total Diagnostic Interval, defined as the time from first  
23 symptom to diagnosis. We will report our time intervals according to the principles outlined  
24 in the 'Aarhus Statement' on the conduct and reporting of research on cancer diagnosis,(29)  
25 and will use the *Model of Pathways to Treatment* as our theoretical framework.(30, 31)  
26 The date of first symptom is defined as '*the time-point when first bodily change(s) and/or*  
27 *symptom(s) is noticed*'. For screen-detected cases we use the date of attendance for the  
28 screening test as the initial date in the patient pathway. Date of diagnosis is based on  
29 pathological diagnosis as reported to the WA Cancer Registry. We will divide the Total  
30 Diagnostic Interval further to include time from first presentation in general practice to  
31 referral (GP Interval), date of referral to first attendance at specialist (Specialist Access  
32 Interval), and time from first attendance at the specialist to date of diagnosis (Specialist  
33 Interval).(41) The GP Interval includes the time taken to order and respond to investigations  
34 available directly in primary care. For patient-reported dates we will apply published mid-  
35 point rules to estimate the actual date where uncertainty exists.(12) Where necessary, a  
36 clinical consensus group will review the data to confirm the date of first symptom and first  
37 presentation to healthcare.  
38  
39  
40  
41  
42  
43  
44  
45  
46  
47  
48  
49  
50

#### 51 *Measurement tools*

52 The following instruments will be used to obtain information about symptoms and key dates  
53 to calculate the Total Diagnostic Interval:  
54  
55  
56  
57  
58  
59  
60

### 1. SYMPTOM Questionnaire

This self-administered questionnaire was developed from the C-SIM(42) measure and has been applied in the UK SYMPTOM study.(43) It includes items specific to each tumour site to capture details of symptoms, their date of onset and time taken to seek help.

### 2. GP record audit tool

This tumour-specific proforma is mailed to the participant's GP to obtain key information on: the date, type and duration of presenting symptoms within the last 12 months, referral information including referral date, and date of first appointment with specialist.

Date of cancer diagnosis is obtained from the WA Cancer Registry.

## Secondary outcomes

### 1. Process Measures of Intervention Delivery

#### a. Campaign Dose

Process evaluation is conducted in each intervention town to collect data on the amount of media exposure achieved, number of campaign resources distributed, number of partnerships established, and number of presentations, events and other activities carried out by campaign staff to promote the campaign messages. Information is collected via monthly reports by the campaign project officers.

#### b. Media Exposure

Media exposure is measured by number and square centimetre coverage of paid press advertisements and unpaid press articles. The value of unpaid media is estimated by calculating the square centimetre space and calculating the cost to purchase that space.

#### c. GP Monitoring

The campaign project officers document number of visits conducted, GP attendance at each visit, and number of case studies completed.

#### d. Costs of intervention delivery

Cost data of delivering the interventions are being collected prospectively (see Health Economic Evaluation below).



## 2. Impact Measures of Intervention

Campaign awareness is being measured at 18 months into the campaign intervention by a computer assisted telephone interview survey. The survey is being conducted on a random sample of adults over 40 years old from the campaign regions and control regions stratified by sex and age, and regions within Trial Area A. Questions measure exposure to the campaign, including unprompted and prompted awareness of campaign elements (i.e. radio, print and campaign brand and logos). Respondents reporting any exposure to the campaign are asked additional questions about comprehension and perceived effectiveness.

## 3. Measures of Clinical Outcomes

We will use the WA datasets (44) to provide linked hospital morbidity and administrative, cancer diagnostic and mortality data in order to examine trends across time on clinical outcomes at the level of the community and individual. We will obtain these data in three tranches:

- a. Cohort of patients diagnosed in 2002-2010 to provide a baseline understanding of the patterns of care and survival;
- b. Cohort of patients diagnosed in 2011-2013 with all linked data after at least two years of follow-up to evaluate short-term clinical effects of the interventions on cancer stage, health care utilisation and disease free status;
- c. Cohort of patients diagnosed in 2011-2013 with all linked data after at least five years of follow-up to evaluate medium-term clinical effects and survival.

## Analysis

The cluster randomised design provides protection against contamination across trial groups when trial patients are managed within the same setting.(45) The primary analysis will compare the Total Diagnostic Intervals and its sub-components between trial groups. Simple analyses such as *t*-tests or more complex regression analyses will be undertaken. Time data are invariably skewed and bounded by the absence of negative times. We will apply a log transformation prior to conducting general linear modelling to compare intervals

1  
2  
3 accounting for exposure to the community and GP interventions within the model,  
4 accounting for clustering effects at the practice level. Where appropriate, comparisons of  
5 arithmetic or geometric means will be performed. The aim of statistical modelling is to  
6 identify the main factors that explain variation in the outcome e.g. patient and practice  
7 characteristics. The primary aim is to adjust for the effect of covariates before the effect of  
8 the intervention is tested as well as 'intervention × phase' interaction with pre- and post-  
9 measurements comparison. We will conduct a series of sensitivity analyses to account for:

- 15 a. symptoms reported with a duration of greater than two years which will be excluded  
16 from the primary analysis.
- 17 b. vague first symptoms such as fatigue and 'feeling different'.

20 Using cancer registry, hospital morbidity and death data we will compare patterns of  
21 hospitalisation and treatment, pseudo-staging at diagnosis using established methods  
22 where full staging data are not available(44, 46-49), disease-free intervals and survival in  
23 people diagnosed with breast, lung, colorectal or prostate cancer resident in Trial Area A  
24 with those in Area B and those resident elsewhere in non-metropolitan and metropolitan  
25 WA. The comparisons will relate to patients diagnosed with one of the four target cancers  
26 in the six years prior to the interventions (2005-2010) and during the two years of  
27 intervention (late 2011 – late 2013). This will enable the effects of the community-level  
28 intervention to be evaluated as a spatial contrast. The same analyses will be conducted  
29 after five-years of follow-up. These analyses will entail all cancer patients in WA during the  
30 specific time periods to assess the effects of the community intervention. In addition, we  
31 will conduct analyses of all participants who have given their consent to measure the effects  
32 of exposure to the GP intervention and combined effect of community and GP interventions  
33 on clinical outcomes at two and five years.

34  
35  
36  
37  
38  
39  
40  
41  
42  
43  
44 All analyses will be conducted by trial statisticians blinded to participant allocation.

#### 51 **4. Health economic evaluation**

52 A health economic evaluation from a health system perspective will be undertaken to  
53 determine whether the resources committed to the trial between the four intervention  
54 arms represent a worthwhile investment in terms of the measured outcomes. This will  
55  
56  
57  
58  
59  
60

1  
2  
3 include a cost-analysis of each intervention and a cost-effectiveness analysis which will  
4 compare costs with related outcomes. Cost components include : campaign intervention  
5 costs (e.g. staffing, travel, campaign resources, media, events, in-kind support); GP  
6 intervention costs (e.g. staffing, travel, education program, resources); additional  
7 staff costs; non-intended costs of non-cancer diagnoses (hospital utilisation); in-kind  
8 personnel contributions from project partners. Resource units and cost per unit will be  
9 applied to calculate total cost.  
10  
11  
12  
13  
14  
15

16  
17 Outcome data will be matched to cost data. In the first instance, cost per change in TDI will  
18 be calculated for each of the four arms of the trial. Longer term cost-effectiveness will also  
19 be calculated to estimate net cost per life year gained for each intervention. The TDI will  
20 provide a surrogate outcome for longer term outcomes using modelling techniques. Once  
21 longer term follow-up data are available, cost-effectiveness ratios will be calculated.  
22  
23  
24  
25  
26  
27

## 28 **Sample Size**

29  
30  
31 The original sample size required for 80% power and  $\alpha=0.05$  to detect a halving of long-  
32 delay risk of 30% to 15% was 840 participants. This sample size calculation accounted for  
33 the design effects from hierarchical correlations and an intra-class correlation coefficient of  
34 0.09 based on similar trial designs.(50)  
35  
36  
37  
38  
39

40 Recruitment was planned to continue until four months after completion of intervention  
41 delivery to allow inclusion of a cohort of newly diagnosed cancer patients who were  
42 exposed to the interventions (i.e 31 March 2014). We have achieved approximately a 50%  
43 accrual rate into the trial which was much higher than our original estimates. Our final  
44 estimated recruitment is 1,359 participants. Based on the distributions of TDIs) from our  
45 previous research, (18,(35) this sample will provide 80% power to detect a 10% difference in  
46 TDI between intervention groups for all four cancers combined, and a 20% difference in TDI  
47 for breast, colorectal and prostate cancer separately, but not lung cancer as this would  
48 require a sample of 2,600 participants.  
49  
50  
51  
52  
53  
54  
55  
56  
57  
58  
59  
60

## **Ethical Considerations**

The trial obtained primary ethics approval from The University of Western Australia's Human Research Ethics Committee (HREC) (RA/4/1/4527). Additional approval was gained through the Department of Health of Western Australia's ethics committee, as well as reciprocal approvals with relevant metropolitan and regional hospitals. There is no formal Data Monitoring Committee for this trial as it was felt unnecessary for this type of intervention. Data management procedures are reported in the HREC submission.

## ***Funding***

The project is funded by a National Health Medical Research Council (NHMRC) Partnership Grant (Grant ID 572765) and the AH Crawford Society. The project is a partnership with Cancer Council Western Australia, the WA Cancer and Palliative Care Network, and the Department of Health Western Australia. The funding source has no role in the design of this study, the interpretation of data or decision to submit results.

## ***Dissemination***

This is the first randomised controlled trial to test the individual and combined effects of a community awareness campaign and GP intervention on time to cancer diagnosis. We plan to publish the main trial outcomes in a single paper and anticipate publishing additional papers exploring the data in more detail and relating to the implementation of this complex intervention. We will present the findings at national and international conferences from late 2014.

**Authors contributions**

JDE, CDJH, CS, KA, AN, FMW, MB conceptualised and designed the study. All authors assisted with the development of the protocol, study design and refinement of study materials. All authors will contribute to implementation of the protocol and acquisition of data. JDE, VG and CDJH led the writing of the protocol. All authors have been involved in drafting and critical evaluation of the manuscript. All authors have read and approved the final version.

**Conflicts of interest**

None declared

**Acknowledgements**

*We wish to thank the following for their contributions to this trial: Find Cancer Early Project Officers (Lisa Barr, Pam Foulkes-Taylor, Libby Foster, Karen Hansen, Amanda Harding, Kerry Keating, Tracey Price, Jo Woodall), Cancer Council WA staff and associated staff, Cancer Council WA Lodges, participants, GPs and Hospital specialists, Cancer Research UK, AH Crawford Treatment Society, Department of Health WA, WA Cancer and Palliative Care Network, WA Country Health Service, National Health and Medical Research Council, Cancer and Palliative Care Research and Evaluation Unit, Val Lishman Health Research Foundation, WA Cancer Registry Staff, WA Data Linkage Branch, Pat Booth, Rhonda Coleman, Hooi Ee, Dickon Hayne, Laura Keith, Andrew Kirke, Mike Mears, Leanne Monterosso, Violet Platt, Iain Steve Pratt, David Preen, Babu Simon, Craig Sinclair, Hayley Staples, Simon Towler, Clare Willix.*

*Protocol version 3. 27 June 2014.*

**FIGURE LEGENDS**

Figure 1. Model of Pathways to Treatment

Figure 2. Map of Western Australia depicting the regional boundaries of Trial Area A, receiving the community intervention, and Trial Area B, acting as the community control.

Figure 3. The 2x2 factorial cluster randomised controlled trial design.(37)

Figure 4. Examples of Find Cancer Early resources – General Symptom Checklist, Prostate postcard and Tell your doctor postcard.

For peer review only

## References

1. Underhill CR, Goldstein D, Grogan PB. Inequity in rural cancer survival in Australia is not an insurmountable problem. *The Medical journal of Australia*. 2006 Nov 6;185(9):479-80. PubMed PMID: 17137450. Epub 2006/12/02. eng.
2. AIHW. *Cancer in Australia 2010: an overview*. Canberra: Australian Institute of Health and Welfare, 2010.
3. Coleman MP, Forman D, Bryant H, et al. Cancer survival in Australia, Canada, Denmark, Norway, Sweden, and the UK, 1995-2007 (the International Cancer Benchmarking Partnership): an analysis of population-based cancer registry data. *Lancet*. 2011 Jan 8;377(9760):127-38. PubMed PMID: 21183212. Pubmed Central PMCID: PMC3018568. Epub 2010/12/25. eng.
4. Butler J, Foot C, Bomb M, et al. The International Cancer Benchmarking Partnership: An international collaboration to inform cancer policy in Australia, Canada, Denmark, Norway, Sweden and the United Kingdom. *Health policy (Amsterdam, Netherlands)*. 2013;112(1):148-55.
5. Hall SE, Holman CD, Wisniewski ZS, et al. Prostate cancer: socio-economic, geographical and private-health insurance effects on care and survival. *BJU international*. 2005 Jan;95(1):51-8. PubMed PMID: 15638894. Epub 2005/01/11. eng.
6. Baade PD, Youlden DR, Coory MD, et al. Urban-rural differences in prostate cancer outcomes in Australia: what has changed? *The Medical journal of Australia*. 2011 Mar 21;194(6):293-6. PubMed PMID: 21426283. Epub 2011/03/24. eng.
7. Coory MD, Baade PD. Urban-rural differences in prostate cancer mortality, radical prostatectomy and prostate-specific antigen testing in Australia. *The Medical journal of Australia*. 2005 Feb 7;182(3):112-5. PubMed PMID: 15698354. Epub 2005/02/09. eng.
8. Mitchell KJ, Fritschi L, Reid A, et al. Rural-urban differences in the presentation, management and survival of breast cancer in Western Australia. *Breast*. 2006 Dec;15(6):769-76. PubMed PMID: 16765049. Epub 2006/06/13. eng.
9. DoHA. *Delivering Regional Cancer Centres*. Department of Health and Ageing, 2010.
10. Jong KE, Vale PJ, Armstrong BK. Rural inequalities in cancer care and outcome. *The Medical journal of Australia*. 2005 Jan 3;182(1):13-4. PubMed PMID: 15651940. Epub 2005/01/18. eng.
11. Baade PD, Dasgupta P, Aitken J, et al. Geographic remoteness and risk of advanced colorectal cancer at diagnosis in Queensland: a multilevel study. *British journal of cancer*. 2011 Sep 27;105(7):1039-41. PubMed PMID: 21897391. Epub 2011/09/08. eng.
12. Allgar VL, Neal RD. Delays in the diagnosis of six cancers: analysis of data from the National Survey of NHS Patients: Cancer. *British journal of cancer*. 2005 Jun 6;92(11):1959-70. PubMed PMID: 15870714. Pubmed Central PMCID: 2361797. Epub 2005/05/05. eng.
13. Richards MA, Westcombe AM, Love SB, et al. Influence of delay on survival in patients with breast cancer: a systematic review. *Lancet*. 1999 Apr 3;353(9159):1119-26. PubMed PMID: 10209974. Epub 1999/04/21. eng.
14. Topping ML, Frydenberg M, Hansen RP, et al. Time to diagnosis and mortality in colorectal cancer: a cohort study in primary care. *British journal of cancer*. 2011 Mar 15;104(6):934-40. PubMed PMID: 21364593. Pubmed Central PMCID: 3065288. Epub 2011/03/03. eng.
15. Cancer Research UK. *About the National Awareness and Early Diagnosis Initiative UK: Cancer Research UK; 2010 [cited 2014]*.
16. Austoker J, Bankhead C, Forbes LJ, et al. Interventions to promote cancer awareness and early presentation: systematic review. *Br J Cancer*. 2009 Dec 3;101 Suppl 2:S31-9. PubMed PMID: 19956160. Pubmed Central PMCID: PMC2790702. Epub 2009/12/04. eng.
17. Athey VL, Suckling RJ, Tod AM, et al. Early diagnosis of lung cancer: evaluation of a community-based social marketing intervention. *Thorax*. 2011 November 2, 2011.
18. Emery JD, Walter FM, Gray V, et al. Diagnosing cancer in the bush: a mixed-methods study of symptom appraisal and help-seeking behaviour in people with cancer from rural Western

- 1  
2  
3 Australia. *Family practice*. 2013 Jun;30(3):294-301. PubMed PMID: 23363540. Epub 2013/02/01.  
4 eng.
- 5 19. Hamilton W. The CAPER studies: five case-control studies aimed at identifying and  
6 quantifying the risk of cancer in symptomatic primary care patients. *Br J Cancer*. 2009  
7 //print;101(S2):S80-S6.
- 8 20. Hamilton W, Peters TJ, Round A, et al. What are the clinical features of lung cancer before  
9 the diagnosis is made? A population based case-control study. *Thorax*. 2005 December 1,  
10 2005;60(12):1059-65.
- 11 21. Hamilton W, Round A, Sharp D, et al. Clinical features of colorectal cancer before diagnosis: a  
12 population-based case-control study. *Br J Cancer*. 2005 Aug 22;93(4):399-405. PubMed PMID:  
13 16106247. Pubmed Central PMCID: PMC2361578. Epub 2005/08/18. eng.
- 14 22. Hamilton W, Sharp DJ, Peters TJ, et al. Clinical features of prostate cancer before diagnosis:  
15 a population-based, case-control study. *British Journal of General Practice*. 2006 October 1,  
16 2006;56(531):756-62.
- 17 23. Hippisley-Cox J, Coupland C. Symptoms and risk factors to identify women with suspected  
18 cancer in primary care: derivation and validation of an algorithm. *The British journal of general  
19 practice : the journal of the Royal College of General Practitioners*. 2013 Jan;63(606):e11-21. PubMed  
20 PMID: 23336450. Pubmed Central PMCID: PMC3529288. Epub 2013/01/23. eng.
- 21 24. Hippisley-Cox J, Coupland C. Symptoms and risk factors to identify men with suspected cancer  
22 in primary care: derivation and validation of an algorithm. *The British journal of general practice : the  
23 journal of the Royal College of General Practitioners*. 2013 Jan;63(606):e1-10. PubMed PMID:  
24 23336443. Pubmed Central PMCID: PMC3529287. Epub 2013/01/23. eng.
- 25 25. F. Khan N. Implementation of a diagnostic tool for symptomatic colorectal cancer in primary  
26 care: a feasibility study. *Primary Health Care Research & Development*. 2009;10(01):54-64.
- 27 26. Hamilton W, Green T, Martins T, et al. Evaluation of risk assessment tools for suspected  
28 cancer in general practice: a cohort study. *The British journal of general practice : the journal of the  
29 Royal College of General Practitioners*. 2013 Jan;63(606):e30-6. PubMed PMID: 23336455. Pubmed  
30 Central PMCID: PMC3529290. Epub 2013/01/23. eng.
- 31 27. Mansell G, Shapley M, Jordan JL, et al. Interventions to reduce primary care delay in cancer  
32 referral: a systematic review. *The British journal of general practice : the journal of the Royal College  
33 of General Practitioners*. 2011 Dec;61(593):e821-35. PubMed PMID: 22137419. Pubmed Central  
34 PMCID: PMC3223780. Epub 2011/12/06. eng.
- 35 28. Cockburn J, Pit S, Zorbas H, Redman S. Investigating breast symptoms in primary care:  
36 enhancing concordance with current best advice. *Cancer detection and prevention*. 2001 /;25(5):407-  
37 13.
- 38 29. Weller D, Vedsted P, Rubin G, et al. The Aarhus statement: improving design and reporting  
39 of studies on early cancer diagnosis. *British journal of cancer*. 2012 Mar 27;106(7):1262-7. PubMed  
40 PMID: 22415239. Pubmed Central PMCID: 3314787. Epub 2012/03/15. eng.
- 41 30. Walter F, Webster A, Scott S, et al. The Andersen Model of Total Patient Delay: a systematic  
42 review of its application in cancer diagnosis. *Journal of health services research & policy*. 2012  
43 Apr;17(2):110-8. PubMed PMID: 22008712. Pubmed Central PMCID: PMC3336942. Epub 2011/10/20.  
44 eng.
- 45 31. Scott SE, Walter FM, Webster A, et al. The model of pathways to treatment:  
46 conceptualization and integration with existing theory. *British journal of health psychology*. 2013  
47 Feb;18(1):45-65. PubMed PMID: 22536840. Epub 2012/04/28. eng.
- 48 32. Smith LK, Pope C, Botha JL. Patients' help-seeking experiences and delay in cancer  
49 presentation: a qualitative synthesis. *Lancet*. 2005 Sep 3-9;366(9488):825-31. PubMed PMID:  
50 16139657. Epub 2005/09/06. eng.
- 51 33. Campbell NC, Murray E, Darbyshire J, et al. Designing and evaluating complex interventions  
52 to improve health care. *BMJ (Clinical research ed)*. 2007 Mar 3;334(7591):455-9. PubMed PMID:  
53 17332585. Pubmed Central PMCID: PMC1808182. Epub 2007/03/03. eng.
- 54  
55  
56  
57  
58  
59  
60



- 1  
2  
3 34. Craig P, Dieppe P, Macintyre S, et al. *Developing and evaluating complex interventions: the new Medical Research Council guidance*. *BMJ (Clinical research ed)*. 2008;337:a1655. PubMed PMID: 18824488. Pubmed Central PMCID: PMC2769032. Epub 2008/10/01. eng.
- 4  
5  
6 35. Emery JD, Walter FM, Gray V, et al. *Diagnosing cancer in the bush: a mixed methods study of GP and specialist diagnostic intervals in rural Western Australia*. *Family practice*. 2013 Jun 3. PubMed PMID: 23699107. Epub 2013/05/24. Eng.
- 7  
8  
9 36. WA Country Health Service. *Regional Profiles*  
10 <http://www.wacountry.health.wa.gov.au/index.php?id=506>: WA Country Health Service; 2011.
- 11 37. Adamson J, Cockayne S, Puffer S, et al. *Review of randomised trials using the post-randomised consent (Zelen's) design*. *Contemporary Clinical Trials*. 2006 8;27(4):305-19.
- 12 38. *National Breast and Ovarian Cancer Centre. The investigation of a new breast symptom: a guide for General Practitioners*. Australia: National Breast and Ovarian Cancer Centre; 2006.
- 13 39. *Department of Health WA. Model of Care for Cancer*. Perth:WA Cancer and Palliative Care Network 2008.
- 14 40. Grimshaw JM, Thomas RE, MacLennan G, et al. *Effectiveness and efficiency of guideline dissemination and implementation strategies*. *Health technology assessment (Winchester, England)*. 2004 Feb;8(6):iii-iv, 1-72. PubMed PMID: 14960256. Epub 2004/02/13. eng.
- 15 41. Olesen F, Hansen RP, Vedsted P. *Delay in diagnosis: the experience in Denmark*. *British journal of cancer*. 2009 Dec 3;101 Suppl 2:S5-8. PubMed PMID: 19956163. Pubmed Central PMCID: 2790711. Epub 2009/12/04. eng.
- 16 42. Neal RD, Nafees S, Pasterfield D, et al. *Patient-reported measurement of time to diagnosis in cancer: development of the Cancer Symptom Interval Measure (C-SIM) and randomised controlled trial of method of delivery*. *BMC health services research*. 2014;14:3. PubMed PMID: 24387663. Pubmed Central PMCID: PMC3922822. Epub 2014/01/07. eng.
- 17 43. *Discovery Programme. The Symptom Study* [http://discovery-programme.org/symptom\\_study.php](http://discovery-programme.org/symptom_study.php): Discovery Programme; 2014.
- 18 44. *Department of Health WA. Data linkage WA* <http://www.datalinkage-wa.org.au/>: Department of Health, Western Australia; 2014.
- 19 45. Campbell MK, Mollison J, Steen N, et al. *Analysis of cluster randomized trials in primary care: a practical approach*. *Family practice*. 2000 April 1, 2000;17(2):192-6.
- 20 46. Yuen E LD, Cisbani L, Rabinowitz C, et al. *Using administrative data to identify and stage breast cancer cases: implications for assessing quality of care*. *Tunmori*. 2011;97(4):428-35.
- 21 47. Cooper GS, Yuan Z, Stange KC, Amini SB, et al. *The utility of Medicare claims data for measuring cancer stage*. *Medical care*. 1999 Jul;37(7):706-11. PubMed PMID: 10424641. Epub 1999/07/29. eng.
- 22 48. Thompson B, Lumley J, Coory M. *Hospital morbidity data for determining spread of disease at diagnosis for colorectal cancer: a validation study*. *Asia-Pacific journal of clinical oncology*. 2012 Sep;8(3):e17-22. PubMed PMID: 22898060. Epub 2012/08/18. eng.
- 23 49. Thompson B, Watson M, Bowman R, et al. *Hospital-activity data inaccurate for determining spread-of-disease at diagnosis for non-small cell lung cancer*. *Australian and New Zealand journal of public health*. 2012 Jun;36(3):212-7. PubMed PMID: 22672025. Epub 2012/06/08. eng.
- 24 50. Campbell MK, Thomson S, Ramsay CR, et al. *Sample size calculator for cluster randomized trials*. *Computers in biology and medicine*. 2004 Mar;34(2):113-25. PubMed PMID: 14972631. Epub 2004/02/20. eng.
- 25  
26  
27  
28  
29  
30  
31  
32  
33  
34  
35  
36  
37  
38  
39  
40  
41  
42  
43  
44  
45  
46  
47  
48  
49  
50  
51  
52  
53  
54  
55  
56  
57  
58  
59  
60

1  
2  
3  
4  
5  
6  
7  
8  
9  
10  
11  
12  
13  
14  
15  
16  
17  
18  
19  
20  
21  
22  
23  
24  
25  
26  
27  
28  
29  
30  
31  
32  
33  
34  
35  
36  
37  
38  
39  
40  
41  
42  
43  
44  
45  
46  
47  
48  
49  
50  
51  
52  
53  
54  
55  
56  
57  
58  
59  
60

**The Improving Rural Cancer Outcomes (IRCO) Trial: a factorial cluster-randomised controlled trial of a complex intervention to reduce time to diagnosis in rural cancer patients in Western Australia: study protocol.**

Jon D Emery, Victoria Gray, Fiona M Walter, Shelley Cheetham, Emma J Croager, Terry Slevin, Christobel Saunders, Tim Threlfall, Kirsten Auret, Anna K Nowak, Elizabeth Geelhoed, Max Bulsara, C D'Arcy J Holman

Jon D Emery: General Practice and Primary Health Care Academic Centre, Melbourne Medical School, The University of Melbourne, Melbourne. Australia. School of Primary, Aboriginal and Rural Health Care, The University of Western Australia, Crawley, Australia;

Victoria Gray: School of Primary, Aboriginal and Rural Health Cancer, The University of Western Australia, Crawley, Australia; School of Population Health, The University of Western Australia, Crawley, Australia; Education and Research Division, Cancer Council Western Australia, Australia.

Fiona Walter: The Primary Care Unit, Department of Public Health & Primary Care, University of Cambridge, UK.

Shelley Cheetham: School of Primary, Aboriginal and Rural Health Cancer, The University of Western Australia, Crawley, Australia

Emma J Croager: Education & Research Division, Cancer Council Western Australia; Centre for Behavioural Research in Cancer Control, Curtin University

Terry Slevin: Education & Research Division, Cancer Council Western Australia; Centre for Behavioural Research in Cancer Control, Curtin University, Australia

Christobel Saunders: School of Surgery, The University of Western Australia.

Timothy Trelfall: Western Australia Cancer Registry, The Department of Health of Western Australia, Australia.

Kirsten Auret – Rural Clinical School of WA, The University of Western Australia, Australia.

Anna K Nowak: School of Medicine and Pharmacology, The University of Western Australia, Crawley, Australia AND Department of Medical Oncology, Sir Charles Gairdner Hospital, Perth, Western Australia.

Elizabeth Geelhoed: School of Population Health, The University of Western Australia, Crawley, Australia

Max Bulsara: Institute of Health and Rehabilitation Research, Notre Dame University, Freemantle, Australia.

D'Arcy Holman: School of Population Health, The University of Western Australia, Crawley, Australia

## ***Abstract***

### *Introduction*

While overall survival for most common cancers in Australia is improving, the rural-urban differential has been widening, with significant excess deaths due to lung, colorectal, breast and prostate cancer in regional Australia. Internationally a major focus on understanding variations in cancer outcomes has been later presentation to healthcare and later diagnosis. Approaches to reducing time to diagnosis of symptomatic cancer include public symptom awareness campaigns and interventions in primary care to improve early cancer detection. This paper reports the protocol of a factorial cluster-randomised trial of community and General Practice (GP) level interventions to reduce the time to diagnosis of cancer in rural Western Australia (WA).

### *Methods and analysis*

The Community Intervention is a symptom awareness campaign tailored for rural Australians delivered through a community engagement model. The GP intervention includes a resource card with symptom risk assessment charts and local referral pathways implemented through multiple academic detailing visits and case studies. Participants are eligible if recently diagnosed with breast, colorectal, lung or prostate cancer who reside in specific regions of rural WA with a planned sample size of 1,350. The primary outcome is the Total Diagnostic Interval, defined as the duration from first symptom (or date of cancer screening test) to cancer diagnosis. Secondary outcomes include cancer stage, healthcare utilisation, disease-free status, survival at two and five years and cost-effectiveness.

### *Ethics and dissemination*

Ethics approval has been granted by the University of Western Australia and from all relevant hospital recruitment sites in Western Australia. Results of this trial will be reported in peer-reviewed publications and in conference presentations.

### *Registration details*

Australian New Zealand Clinical Trials Registry (ANZCTR). ACTRN12610000872033

## Background

Rural Australians are more likely to die within 5 years of a cancer diagnosis than people from metropolitan areas.(1) While overall survival for most common cancers in Australia is improving, the rural-urban differential has been widening, with significant excess deaths due to lung, colorectal, breast and prostate cancer in regional Australia.(2) Similar disparities in cancer outcomes across certain patient groups have been described worldwide.(3) As part of the International Cancer Benchmarking Partnership, a major focus on understanding variations in cancer outcomes has been later presentation to healthcare and later diagnosis.(4)

Previous studies have shown that patients living in rural Australia are less likely to receive curative or reconstructive surgery, radiotherapy or anti-cancer drug treatment.(5-8) Policy initiatives have focused, therefore, on reducing disparities in access to treatment.(9) Access to treatment is an important determinant of outcome, but later presentation and stage at diagnosis have also been observed in rural cancer patients.(10, 11) International research suggests that the time taken to appraise symptoms and seek help (so-called 'patient delay') and management in primary care are also key determinants of cancer outcomes.(12) Time to diagnosis is associated with poorer survival for several common cancers.(13, 14)

One of the approaches to reducing later presentation to healthcare has been community symptom awareness campaigns. These have formed a major component of the UK National Awareness and Early Diagnosis Initiative(NAEDI) as part of the policy to improve cancer outcomes.(15) A systematic review of cancer symptom awareness campaigns published in 2009 found insufficient evidence about their effect on presentation to healthcare.(16) Since then further studies have begun to show potential effects on presentation and cancer diagnoses.(17)

A second approach has aimed at improving early recognition of patients in primary care with symptoms suggestive of cancer. A major challenge for general practitioners (GPs) is that the symptoms of many cancers are common in the community and overlap with prevalent benign conditions. GPs need to assess the risk, or diagnostic probability, of an underlying

1  
2  
3 cancer and determine whether further investigation is justified. Until recently, there was  
4 little epidemiological evidence demonstrating how well symptoms predict risk of an  
5 underlying cancer from primary care populations.(18) Analysis of data in case-control  
6 studies using large UK general practice databases, notably the CAPER (Cancer Prediction in  
7 Exeter) studies(19-22) and QCancer research(23, 24), has led to significant advances in our  
8 understanding of the epidemiology of cancer symptoms in primary care.  
9

10  
11  
12  
13  
14  
15 The CAPER studies have quantified the risk of individual and paired symptoms, signs and  
16 primary care investigations for a number of cancers including colorectal, lung and prostate.  
17 These have been evaluated as risk assessment tools (RATs) in paper versions(25) and are  
18 currently undergoing evaluation as computerised decision support tools embedded in the  
19 electronic medical records of English general practices.(26) Various interventions including  
20 audit and feedback, educational visits, guidelines and decision support have been tested in  
21 general practice to improve cancer diagnosis.(27) None of the 22 trials included in a  
22 systematic review of interventions to support cancer diagnosis in primary care examined  
23 effects on diagnostic delay, although audit and feedback was shown to improve clinical  
24 management.(28)  
25  
26  
27  
28  
29  
30  
31  
32

33  
34  
35 Conducting research in the field of 'diagnostic delay' in cancer has many methodological  
36 challenges. The Aarhus Statement discusses these and provides consensus guidelines on  
37 appropriate definitions and the conduct and reporting of such research.(29) One  
38 recommendation is the application of theoretical models such as The Model of Pathways to  
39 Treatment (30, 31) (Figure 1). This model proposes four key intervals:  
40  
41  
42

- 43 1. The **Appraisal Interval**. The nature of a person's symptoms is one of the most important  
44 factors determining the duration of the Appraisal Interval. Misattribution of symptoms  
45 either to a previous benign or concurrent condition or non-recognition of the  
46 seriousness of symptoms contribute to longer Appraisal Intervals.  
47  
48  
49
- 50 2. The **Help-Seeking Interval**. Various factors may contribute to this interval including  
51 patient factors such as competing events (e.g. holidays), and emotional ones such as  
52 fear. This includes fear of the consultation and examination, or of the diagnosis and  
53 treatment. Access to primary care and sanctioning help-seeking by family or friends, so  
54  
55  
56  
57  
58  
59  
60

1  
2  
3 that patients do not perceive themselves as wasting the doctor's time, are also  
4 important factors.(32)

- 5  
6  
7 3. The **Diagnostic Interval**. Depending on the healthcare setting this may involve a series  
8 of healthcare visits, referrals and investigations and often represents a complex process.  
9 System factors including the role of primary care as a gatekeeper and access to  
10 investigations and specialist care are key factors determining this interval.  
11  
12 4. **The Pre-Treatment Interval**. The time from formal cancer diagnosis to initiation of  
13 treatment is also strongly influenced by several healthcare system factors such as access  
14 to staging investigations and specialised treatments.  
15  
16  
17  
18  
19

20  
21 Our research on rural cancer outcomes is applying the well-established Medical Research  
22 Council (MRC) methodological framework for the design and evaluation of complex  
23 interventions.(33, 34) Our initial exploratory mixed-methods study aimed to explore the  
24 context of rural cancer diagnosis in WA and inform the development of our complex  
25 intervention. In summary, in-depth interviews with 66 people recently diagnosed with  
26 breast, lung, prostate or colorectal cancer from regional WA found longer duration of  
27 symptom appraisal for colorectal cancer compared with other cancers. Participants defined  
28 core characteristics of rural Australians as optimism, stoicism and machismo. These  
29 features, as well as poorer access to health care, contributed to later presentation of  
30 cancer.(18) In addition, there were significant overall differences between cancers in terms  
31 of time from presentation in general practice to referral, from GP referral to specialist  
32 appointment, and from specialist appointment to cancer diagnosis. These differences were  
33 due to the nature of presenting symptoms, access to diagnostic tests and multiple visits to  
34 specialists. Breast cancer was diagnosed more quickly because its symptoms are more  
35 specific and well recognised by the community, and due to better access to diagnostic tests  
36 and specialist one-stop clinics.(35)  
37  
38  
39  
40  
41  
42  
43  
44  
45  
46  
47  
48  
49

50  
51 These findings contributed to the development of the interventions and design of the  
52 Improving Rural Cancer Outcomes (IRCO) Trial: a factorial cluster-randomised controlled  
53 trial of community-based and general practice-based interventions which aims to reduce  
54 the time to diagnosis in rural patients presenting with prostate, breast, colorectal or lung  
55 cancer in Western Australia.  
56  
57  
58  
59  
60

## Methods and Trial Design

### *Design and setting*

This 2x2 factorial cluster randomised controlled trial is set in Western Australia, the largest Australian state geographically, with a population of 2.29 million (approximately 10% of the Australian population). Two thirds of the WA population live in metropolitan Perth and the remainder are widely geographically dispersed. Two Trial Areas were matched for population size, demographics including age and Aboriginality, and similar cancer incidence, based on the most recent available data (from 2006) when the trial was planned (Figure 2 presents more recent data on population size from 2010). Trial Area A comprises the Wheatbelt (155,256 km<sup>2</sup>), Goldfields (770,488 km<sup>2</sup>) and Great Southern (39,007 km<sup>2</sup>) regions, and Trial Area B includes the Peel/South West (29,646 km<sup>2</sup>) and MidWest (470,000km<sup>2</sup>) regions.(36)

### **Randomisation**

Trial Area A has been allocated to receive the community symptom awareness campaign intervention and Trial Area B acts as the community campaign control region. In both Trial Areas general practices have been randomised to receive the education intervention or control, stratified by practice size (<=1 GP; 2 to 4 GPs; 5+ GPs). GPs who worked at more than one practice have been identified, and their practices have been treated as one practice for the purpose of randomisation to avoid contamination (Figure 3).

Practices have been randomly assigned to intervention or control arm using a cluster version of Zelen's method of post-randomised consent: intervention practices have been invited to receive the educational package while control practices receive no information about the trial.(37) This enables non-intervention practices to act as true controls by minimising the Hawthorne effect in a situation where placebo and double blind experimental conditions are impossible to achieve. The Hawthorne effect occurs when the researchers' procedures and communications act as interventions in themselves that change behaviours, such as if the control cluster were to adopt the practices or policies promoted to the intervention cluster. This would destroy the trial's ability to identify a

1  
2  
3 benefit of the intervention, if one exists. Furthermore, it allows a pragmatic delivery of the  
4 intervention and measure of its uptake in routine practice. Intervention practices which  
5 decline the invitation to receive the educational package will be analysed on an intention-  
6 to-treat basis. Randomisation has been performed by the trial statistician. As the number of  
7 working GPs in a given practice varies, the randomisation has taken into account practice  
8 size. Each practice has been categorized into: one GP in the practice, 2-4 GPs or five or  
9 more GPs. A random sample proportional to the size of the practice has been used  
10 employing 'samplepps' macro in Stata.  
11  
12  
13  
14  
15  
16  
17  
18  
19  
20

### 21 ***Patient recruitment and inclusion criteria***

22 From 1 March 2012, four months after the interventions commenced, all patients meeting  
23 the following criteria are being invited to contribute their data for the trial:  
24  
25

- 26 • Adults aged over 18 years;
- 27 • Diagnosed with breast, lung, colorectal or prostate cancer between 1 January 2012  
28 and the recruitment end date of 31 March 2014; and
- 29 • Resident of Trial Areas A or B at the time of diagnosis.  
30  
31  
32  
33  
34  
35

### 36 ***Recruitment Strategy***

37 Eligible participants are identified via:

- 38 1. The WA Cancer Registry (WACR). A letter and participant information sheet is mailed  
39 from the WACR directly to newly diagnosed cancer patients. After three-weeks non  
40 responders are followed up by the research team via phone or mail.  
41  
42
- 43 2. Cancer Council Western Australia's (CCWA) residential lodges. We approach eligible  
44 patients while staying at CCWA charitable accommodation during their cancer treatment in  
45 Perth. A large proportion of rural cancer patients, especially those receiving radiotherapy or  
46 chemotherapy, reside in one of the lodges for several weeks during their treatment. Eligible  
47 patients receive the same participant information sheet as part of their Lodge Welcome  
48 Pack by the lodge receptionists and are followed up by the research team.  
49  
50  
51  
52

53 Participants are invited to sign a consent form, which includes agreement to access their  
54 medical records, and return it with their completed SYMPTOM questionnaire.  
55  
56  
57  
58  
59  
60



## ***Study Interventions***

The Trial includes interventions at two levels: a community symptom awareness campaign ('the community intervention'); and a GP educational package incorporating symptom risk assessment charts and referral guidance which is implemented through multiple academic detailing visits and case studies ('the GP intervention'). Both interventions are being delivered between 1 November 2011 to 31 December 2013.

### *The Community Intervention*

We modified existing resources developed for The Cancer Research UK 'Spot Cancer Early' and the UK National Health Service '3 week cough' campaigns to incorporate the findings of our exploratory mixed-methods study (18,(35), and to make them relevant to a rural Australian community.

Materials have been further modified following three community forums held in the major towns of the campaign target regions. Feedback was obtained about the campaign logo, design, choice of images, locally acceptable language, and contact details. The campaign is named the Find Cancer Early campaign and the materials explicitly use the Cancer Council WA branding, recognising the strong community support and credibility of this organisation. Community members wanted the campaign to focus on the positives associated with early detection and the use of simple, non-medical terms when describing symptoms. A campaign message development meeting was then held between the project team, social marketing experts and health professionals to develop a framework for the campaign and message hierarchy.

The target of the campaign is men and women over the age of 40; it aims to raise awareness of the symptoms of bowel, lung, prostate and breast cancer, and to help people overcome the barriers to seeking medical help. The primary campaign item is a plain-language symptom checklist (Figure 4). Other materials include: newspaper adverts based on campaign materials; radio adverts for each of the 4 cancers; tumour-specific postcards featuring regional images and quotations about relevant symptoms (Figure 4); generic postcards providing strategies to overcome barriers to seeking help (Figure 4); a DVD outlining tumour specific symptoms featuring health professionals and regional community

1  
2  
3 members; an Indigenous version of the symptom checklist; a website; and posters and  
4  
5 banners.  
6  
7

8  
9 Five project officers, with a combined full time equivalent of 3.0, are delivering the  
10 campaign across the three regions of WA in Trial Area A. They use a community  
11 engagement approach building partnerships to deliver and disseminate the campaign  
12 messages with presentations, displays and campaign resource distribution. Paid advertising  
13 and articles in regional newspapers and radio supplement this dissemination strategy.  
14  
15 Television is not being used to avoid contamination in the control area.  
16  
17  
18  
19

### 20 21 *The GP Intervention*

22 A GP education resource card, 'The Rural Cancer Initiative: a Guide for General  
23 Practitioners', has been developed with input from rural GPs and health professional  
24 advisors. The novel aspect of this intervention is the implementation of the CAPER risk  
25 assessment charts for colorectal,(21) lung(20) and prostate(22) cancer. The resource card  
26 contains the clinical implications of these risk charts including diagnostic assessment. In  
27 addition the resource card summarises the National Breast and Ovarian Cancer Centre  
28 guidelines for investigating new breast symptoms (38) and local referral guidelines and  
29 hospital contacts, including recommendations about access to cancer multidisciplinary  
30 teams.(39)  
31  
32  
33  
34  
35  
36  
37  
38  
39

40 The GP resource card is being implemented through a series of four academic detailing  
41 practice visits, supplemented by a series of question-and-answer case studies for  
42 completion between visits designed to reinforce key messages.(40) The practice visits  
43 present specific components of the resource card and facilitate discussion within the  
44 practice around recently diagnosed cancer patients. GPs are eligible for Royal Australian  
45 College of General Practitioners and Australian College of Rural and Remote Medicine  
46 professional development points on completion of the case studies and attendance at  
47 practice visits.  
48  
49  
50  
51  
52  
53  
54  
55  
56  
57  
58  
59  
60

## Outcomes and Measures

### Primary Outcome

The primary outcome is the Total Diagnostic Interval, defined as the time from first symptom to diagnosis. We will report our time intervals according to the principles outlined in the 'Aarhus Statement' on the conduct and reporting of research on cancer diagnosis,(29) and will use the *Model of Pathways to Treatment* as our theoretical framework.(30, 31) The date of first symptom is defined as '*the time-point when first bodily change(s) and/or symptom(s) is noticed*'. For screen-detected cases we use the date of attendance for the screening test as the initial date in the patient pathway. Date of diagnosis is based on pathological diagnosis as reported to the WA Cancer Registry. We will divide the Total Diagnostic Interval further to include time from first presentation in general practice to referral (GP Interval), date of referral to first attendance at specialist (Specialist Access Interval), and time from first attendance at the specialist to date of diagnosis (Specialist Interval).(41) The GP Interval includes the time taken to order and respond to investigations available directly in primary care. For patient-reported dates we will apply published mid-point rules to estimate the actual date where uncertainty exists.(12) Where necessary, a clinical consensus group will review the data to confirm the date of first symptom and first presentation to healthcare.

#### *Measurement tools*

The following instruments will be used to obtain information about symptoms and key dates to calculate the Total Diagnostic Interval:

1. *SYMPTOM Questionnaire*

This self-administered questionnaire was developed from the C-SIM(42) measure and has been applied in the UK SYMPTOM study.(43) It includes items specific to each tumour site to capture details of symptoms, their date of onset and time taken to seek help.

2. *GP record audit tool*

This tumour-specific proforma is mailed to the participant's GP to obtain key information on: the date, type and duration of presenting symptoms within the last 12 months, referral information including referral date, and date of first appointment with specialist.

1  
2  
3 Date of cancer diagnosis is obtained from the WA Cancer Registry.  
4

## 5 **Secondary outcomes**

### 8 **1. Process Measures of Intervention Delivery**

#### 10 *a. Campaign Dose*

11  
12 Process evaluation is conducted in each intervention town to collect data on the amount of  
13 media exposure achieved, number of campaign resources distributed, number of  
14 partnerships established, and number of presentations, events and other activities carried  
15 out by campaign staff to promote the campaign messages. Information is collected via  
16 monthly reports by the campaign project officers.  
17  
18  
19  
20  
21

#### 22 *b. Media Exposure*

23  
24 Media exposure is measured by number and square centimetre coverage of paid press  
25 advertisements and unpaid press articles. The value of unpaid media is estimated by  
26 calculating the square centimetre space and calculating the cost to purchase that space.  
27  
28  
29  
30

#### 31 *c. GP Monitoring*

32  
33 The campaign project officers document number of visits conducted, GP attendance at each  
34 visit, and number of case studies completed.  
35  
36  
37

#### 38 *d. Costs of intervention delivery*

39  
40 Cost data of delivering the interventions are being collected prospectively (see Health  
41 Economic Evaluation below).  
42  
43  
44  
45

### 46 **2. Impact Measures of Intervention**

47  
48 Campaign awareness is being measured at 18 months into the campaign intervention by a  
49 computer assisted telephone interview survey. The survey is being conducted on a random  
50 sample of adults over 40 years old from the campaign regions and control regions stratified  
51 by sex and age, and regions within Trial Area A. Questions measure exposure to the  
52 campaign, including unprompted and prompted awareness of campaign elements (i.e.  
53  
54  
55  
56  
57  
58  
59  
60

1  
2  
3 radio, print and campaign brand and logos). Respondents reporting any exposure to the  
4 campaign are asked additional questions about comprehension and perceived effectiveness.  
5  
6  
7

### 9 **3. Measures of Clinical Outcomes**

10 We will use the WA datasets (44) to provide linked hospital morbidity and administrative,  
11 cancer diagnostic and mortality data in order to examine trends across time on clinical  
12 outcomes at the level of the community and individual. We will obtain these data in three  
13 tranches:  
14  
15  
16  
17

- 18 a. Cohort of patients diagnosed in 2002-2010 to provide a baseline understanding of  
19 the patterns of care and survival;
- 20 b. Cohort of patients diagnosed in 2011-2013 with all linked data after at least two  
21 years of follow-up to evaluate short-term clinical effects of the interventions on  
22 cancer stage, health care utilisation and disease free status;
- 23 c. Cohort of patients diagnosed in 2011-2013 with all linked data after at least five  
24 years of follow-up to evaluate medium-term clinical effects and survival.  
25  
26  
27  
28  
29  
30  
31

### 32 **Analysis**

33  
34 The cluster randomised design provides protection against contamination across trial groups  
35 when trial patients are managed within the same setting.<sup>(45)</sup> The primary analysis will  
36 compare the Total Diagnostic Intervals and its sub-components between trial groups.  
37 Simple analyses such as *t*-tests or more complex regression analyses will be undertaken.  
38 Time data are invariably skewed and bounded by the absence of negative times. We will  
39 apply a log transformation prior to conducting general linear modelling to compare intervals  
40 accounting for exposure to the community and GP interventions within the model,  
41 accounting for clustering effects at the practice level. Where appropriate, comparisons of  
42 arithmetic or geometric means will be performed. The aim of statistical modelling is to  
43 identify the main factors that explain variation in the outcome e.g. patient and practice  
44 characteristics. The primary aim is to adjust for the effect of covariates before the effect of  
45 the intervention is tested as well as 'intervention × phase' interaction with pre- and post-  
46 measurements comparison. We will conduct a series of sensitivity analyses to account for:  
47  
48  
49  
50  
51  
52  
53  
54  
55  
56  
57  
58  
59  
60

- a. symptoms reported with a duration of greater than two years which will be excluded from the primary analysis.
- b. vague first symptoms such as fatigue and 'feeling different'.

Using cancer registry, hospital morbidity and death data we will compare patterns of hospitalisation and treatment, pseudo-staging at diagnosis using established methods where full staging data are not available(44, 46-49), disease-free intervals and survival in people diagnosed with breast, lung, colorectal or prostate cancer resident in Trial Area A with those in Area B and those resident elsewhere in non-metropolitan and metropolitan WA. The comparisons will relate to patients diagnosed with one of the four target cancers in the six years prior to the interventions (2005-2010) and during the two years of intervention (late 2011 – late 2013). This will enable the effects of the community-level intervention to be evaluated as a spatial contrast. The same analyses will be conducted after five-years of follow-up. These analyses will entail all cancer patients in WA during the specific time periods to assess the effects of the community intervention. In addition, we will conduct analyses of all ~~consented trial~~ participants who have given their consent to measure the effects of exposure to the GP intervention and combined effect of community and GP interventions on clinical outcomes at two and five years.

All analyses will be conducted by trial statisticians blinded to participant allocation.

#### ***4. Health economic evaluation***

A health economic evaluation from a health system perspective will be undertaken to determine whether the resources committed to the trial between the four intervention arms represent a worthwhile investment in terms of the measured outcomes. This will include a cost-analysis of each intervention and a cost-effectiveness analysis which will compare costs with related outcomes. Cost components include : campaign intervention costs (e.g. staffing, travel, campaign resources, media, events, in-kind support); GP intervention costs (e.g. staffing, travel, education program, resources); additional staff costs; non-intended costs of non-cancer diagnoses (hospital utilisation); in-kind personnel contributions from project partners. Resource units and cost per unit will be applied to calculate total cost.

1  
2  
3  
4  
5 Outcome data will be matched to cost data. In the first instance, cost per change in TDI will  
6  
7 be calculated for each of the four arms of the trial. Longer term cost-effectiveness will also  
8  
9 be calculated to estimate net cost per life year gained for each intervention. The TDI will  
10 provide a surrogate outcome for longer term outcomes using modelling techniques. Once  
11  
12 longer term follow-up data are available, cost-effectiveness ratios will be calculated.  
13

## 14 15 16 **Sample Size**

17  
18 The original sample size required for 80% power and  $\alpha=0.05$  to detect a halving of long-  
19  
20 delay risk of 30% to 15% was 840 participants. This sample size calculation accounted for  
21  
22 the design effects from hierarchical correlations and an intra-class correlation coefficient of  
23  
24 0.09 based on similar trial designs.(50)  
25

26  
27 Recruitment was planned to continue until four months after completion of intervention  
28  
29 delivery to allow inclusion of a cohort of newly diagnosed cancer patients who were  
30  
31 exposed to the interventions (i.e 31 March 2014). We have achieved approximately a 50%  
32  
33 accrual rate into the trial which was much higher than our original estimates. Our final  
34  
35 estimated recruitment is 1,359 participants. Based on the distributions of TDIs) from our  
36  
37 previous research, (18,(35) this sample will provide 80% power to detect a 10% difference in  
38  
39 TDI between intervention groups for all four cancers combined, and a 20% difference in TDI  
40  
41 for breast, colorectal and prostate cancer separately, but not lung cancer as this would  
42  
43 require a sample of 2,600 participants.  
44  
45

## 46 **Ethical Considerations**

47  
48 The trial obtained primary ethics approval from The University of Western Australia's  
49  
50 Human Research Ethics Committee ([HREC](#)) (RA/4/1/4527). Additional approval was gained  
51  
52 through the Department of Health of Western Australia's ethics committee, as well as  
53  
54 reciprocal approvals with relevant metropolitan and regional hospitals. There is no formal  
55  
56 Data Monitoring Committee for this trial as it was felt unnecessary for this type of  
57  
58 intervention. Data management procedures are reported in the HREC submission.  
59  
60

## ***Funding***

The project is funded by a National Health Medical Research Council (NHMRC) Partnership Grant (Grant ID 572765) and the AH Crawford Society. The project is a partnership with Cancer Council Western Australia, the WA Cancer and Palliative Care Network, and the Department of Health Western Australia. The funding source has no role in the design of this study, the interpretation of data or decision to submit results.

## ***Dissemination***

This is the first randomised controlled trial to test the individual and combined effects of a community awareness campaign and GP intervention on time to cancer diagnosis. We plan to publish the main trial outcomes in a single paper and anticipate publishing additional papers exploring the data in more detail and relating to the implementation of this complex intervention. We will present the findings at national and international conferences from late 2014.

## ***Authors contributions***

JDE, CDJH, CS, KA, AN, FMW, MB conceptualised and designed the study. All authors assisted with the development of the protocol, study design and refinement of study materials. All authors will contribute to implementation of the protocol and acquisition of data. JDE, VG and CDJH led the writing of the protocol. All authors have been involved in drafting and critical evaluation of the manuscript. All authors have read and approved the final version.

## ***Conflicts of interest***

None declared

## ***Acknowledgements***

We wish to thank the following for their contributions to this trial: Find Cancer Early Project Officers (Lisa Barr, Pam Foulkes-Taylor, Libby Foster, Karen Hansen, Amanda Harding, Kerry



1  
2  
3 Keating, Tracey Price, Jo Woodall), Cancer Council WA staff and associated staff, Cancer  
4 Council WA Lodges, participants, GPs and Hospital specialists, Cancer Research UK, AH  
5 Crawford Treatment Society, Department of Health WA, WA Cancer and Palliative Care  
6 Network, WA Country Health Service, National Health and Medical Research Council, Cancer  
7 and Palliative Care Research and Evaluation Unit, Val Lishman Health Research Foundation,  
8 WA Cancer Registry Staff, WA Data Linkage Branch, Pat Booth, Rhonda Coleman, Hooi Ee,  
9 Dickon Hayne, Laura Keith, Andrew Kirke, Mike Mears, Leanne Monterosso, Violet Platt, Iain  
10 Steve Pratt, David Preen, Babu Simon, Craig Sinclair, Hayley Staples, Simon Towler, Clare  
11 Willix.

12  
13  
14  
15  
16  
17  
18  
19 [Protocol version 3. 27 June 2014.](#)  
20  
21  
22  
23

## 24 **References**

- 25 1. Underhill CR, Goldstein D, Grogan PB. Inequity in rural cancer survival in Australia is not an  
26 insurmountable problem. *The Medical journal of Australia*. 2006 Nov 6;185(9):479-80. PubMed  
27 PMID: 17137450. Epub 2006/12/02. eng.
- 28 2. AIHW. *Cancer in Australia 2010: an overview*. Canberra: Australian Institute of Health and  
29 Welfare, 2010.
- 30 3. Coleman MP, Forman D, Bryant H, Butler J, Rachet B, Maringe C, et al. Cancer survival in  
31 Australia, Canada, Denmark, Norway, Sweden, and the UK, 1995-2007 (the International Cancer  
32 Benchmarking Partnership): an analysis of population-based cancer registry data. *Lancet*. 2011 Jan  
33 8;377(9760):127-38. PubMed PMID: 21183212. Pubmed Central PMCID: PMC3018568. Epub  
34 2010/12/25. eng.
- 35 4. Butler J, Foot C, Bomb M, Hiom S, Coleman M, Bryant H, et al. *The International Cancer*  
36 *Benchmarking Partnership: An international collaboration to inform cancer policy in Australia,*  
37 *Canada, Denmark, Norway, Sweden and the United Kingdom. Health policy (Amsterdam,*  
38 *Netherlands)*. 2013;112(1):148-55.
- 39 5. Hall SE, Holman CD, Wisniewski ZS, Semmens J. Prostate cancer: socio-economic,  
40 geographical and private-health insurance effects on care and survival. *BJU international*. 2005  
41 Jan;95(1):51-8. PubMed PMID: 15638894. Epub 2005/01/11. eng.
- 42 6. Baade PD, Youlden DR, Coory MD, Gardiner RA, Chambers SK. Urban-rural differences in  
43 prostate cancer outcomes in Australia: what has changed? *The Medical journal of Australia*. 2011  
44 Mar 21;194(6):293-6. PubMed PMID: 21426283. Epub 2011/03/24. eng.
- 45 7. Coory MD, Baade PD. Urban-rural differences in prostate cancer mortality, radical  
46 prostatectomy and prostate-specific antigen testing in Australia. *The Medical journal of Australia*.  
47 2005 Feb 7;182(3):112-5. PubMed PMID: 15698354. Epub 2005/02/09. eng.
- 48 8. Mitchell KJ, Fritschi L, Reid A, McEvoy SP, Ingram DM, Jamrozik K, et al. Rural-urban  
49 differences in the presentation, management and survival of breast cancer in Western Australia.  
50 *Breast*. 2006 Dec;15(6):769-76. PubMed PMID: 16765049. Epub 2006/06/13. eng.
- 51 9. *Delivering Regional Cancer Centres*. Department of Health and Ageing, 2010.
- 52 10. Jong KE, Vale PJ, Armstrong BK. Rural inequalities in cancer care and outcome. *The Medical*  
53 *journal of Australia*. 2005 Jan 3;182(1):13-4. PubMed PMID: 15651940. Epub 2005/01/18. eng.
- 54  
55  
56  
57  
58  
59  
60

11. Baade PD, Dasgupta P, Aitken J, Turrell G. Geographic remoteness and risk of advanced colorectal cancer at diagnosis in Queensland: a multilevel study. *British journal of cancer*. 2011 Sep 27;105(7):1039-41. PubMed PMID: 21897391. Epub 2011/09/08. eng.
12. Allgar VL, Neal RD. Delays in the diagnosis of six cancers: analysis of data from the National Survey of NHS Patients: Cancer. *British journal of cancer*. 2005 Jun 6;92(11):1959-70. PubMed PMID: 15870714. Pubmed Central PMCID: 2361797. Epub 2005/05/05. eng.
13. Richards MA, Westcombe AM, Love SB, Littlejohns P, Ramirez AJ. Influence of delay on survival in patients with breast cancer: a systematic review. *Lancet*. 1999 Apr 3;353(9159):1119-26. PubMed PMID: 10209974. Epub 1999/04/21. eng.
14. Topping ML, Frydenberg M, Hansen RP, Olesen F, Hamilton W, Vedsted P. Time to diagnosis and mortality in colorectal cancer: a cohort study in primary care. *British journal of cancer*. 2011 Mar 15;104(6):934-40. PubMed PMID: 21364593. Pubmed Central PMCID: 3065288. Epub 2011/03/03. eng.
15. Cancer Research UK. About the National Awareness and Early Diagnosis Initiative UK: Cancer Research UK; 2010 [cited 2014].
16. Austoker J, Bankhead C, Forbes LJ, Atkins L, Martin F, Robb K, et al. Interventions to promote cancer awareness and early presentation: systematic review. *Br J Cancer*. 2009 Dec 3;101 Suppl 2:S31-9. PubMed PMID: 19956160. Pubmed Central PMCID: PMC2790702. Epub 2009/12/04. eng.
17. Athey VL, Suckling RJ, Tod AM, Walters SJ, Rogers TK. Early diagnosis of lung cancer: evaluation of a community-based social marketing intervention. *Thorax*. 2011 November 2, 2011.
18. Emery JD, Walter FM, Gray V, Sinclair C, Howting D, Bulsara M, et al. Diagnosing cancer in the bush: a mixed-methods study of symptom appraisal and help-seeking behaviour in people with cancer from rural Western Australia. *Family practice*. 2013 Jun;30(3):294-301. PubMed PMID: 23363540. Epub 2013/02/01. eng.
19. Hamilton W. The CAPER studies: five case-control studies aimed at identifying and quantifying the risk of cancer in symptomatic primary care patients. *Br J Cancer*. 2009 //print;101(S2):S80-S6.
20. Hamilton W, Peters TJ, Round A, Sharp D. What are the clinical features of lung cancer before the diagnosis is made? A population based case-control study. *Thorax*. 2005 December 1, 2005;60(12):1059-65.
21. Hamilton W, Round A, Sharp D, Peters TJ. Clinical features of colorectal cancer before diagnosis: a population-based case-control study. *Br J Cancer*. 2005 Aug 22;93(4):399-405. PubMed PMID: 16106247. Pubmed Central PMCID: PMC2361578. Epub 2005/08/18. eng.
22. Hamilton W, Sharp DJ, Peters TJ, Round AP. Clinical features of prostate cancer before diagnosis: a population-based, case-control study. *British Journal of General Practice*. 2006 October 1, 2006;56(531):756-62.
23. Hippisley-Cox J, Coupland C. Symptoms and risk factors to identify women with suspected cancer in primary care: derivation and validation of an algorithm. *The British journal of general practice : the journal of the Royal College of General Practitioners*. 2013 Jan;63(606):e11-21. PubMed PMID: 23336450. Pubmed Central PMCID: PMC3529288. Epub 2013/01/23. eng.
24. Hippisley-Cox J, Coupland C. Symptoms and risk factors to identify men with suspected cancer in primary care: derivation and validation of an algorithm. *The British journal of general practice : the journal of the Royal College of General Practitioners*. 2013 Jan;63(606):e1-10. PubMed PMID: 23336443. Pubmed Central PMCID: PMC3529287. Epub 2013/01/23. eng.
25. F. Khan N. Implementation of a diagnostic tool for symptomatic colorectal cancer in primary care: a feasibility study. *Primary Health Care Research & Development*. 2009;10(01):54-64.
26. Hamilton W, Green T, Martins T, Elliott K, Rubin G, Macleod U. Evaluation of risk assessment tools for suspected cancer in general practice: a cohort study. *The British journal of general practice : the journal of the Royal College of General Practitioners*. 2013 Jan;63(606):e30-6. PubMed PMID: 23336455. Pubmed Central PMCID: PMC3529290. Epub 2013/01/23. eng.

- 1  
2  
3 27. Mansell G, Shapley M, Jordan JL, Jordan K. Interventions to reduce primary care delay in  
4 cancer referral: a systematic review. *The British journal of general practice : the journal of the Royal*  
5 *College of General Practitioners*. 2011 Dec;61(593):e821-35. PubMed PMID: 22137419. Pubmed  
6 Central PMCID: PMC3223780. Epub 2011/12/06. eng.
- 7 28. Cockburn J, Pit S, Zorbas H, Redman S. Investigating breast symptoms in primary care:  
8 enhancing concordance with current best advice. *Cancer detection and prevention*. 2001 /;25(5):407-  
9 13.
- 10 29. Weller D, Vedsted P, Rubin G, Walter FM, Emery J, Scott S, et al. The Aarhus statement:  
11 improving design and reporting of studies on early cancer diagnosis. *British journal of cancer*. 2012  
12 Mar 27;106(7):1262-7. PubMed PMID: 22415239. Pubmed Central PMCID: 3314787. Epub  
13 2012/03/15. eng.
- 14 30. Walter F, Webster A, Scott S, Emery J. The Andersen Model of Total Patient Delay: a  
15 systematic review of its application in cancer diagnosis. *Journal of health services research & policy*.  
16 2012 Apr;17(2):110-8. PubMed PMID: 22008712. Pubmed Central PMCID: PMC3336942. Epub  
17 2011/10/20. eng.
- 18 31. Scott SE, Walter FM, Webster A, Sutton S, Emery J. The model of pathways to treatment:  
19 conceptualization and integration with existing theory. *British journal of health psychology*. 2013  
20 Feb;18(1):45-65. PubMed PMID: 22536840. Epub 2012/04/28. eng.
- 21 32. Smith LK, Pope C, Botha JL. Patients' help-seeking experiences and delay in cancer  
22 presentation: a qualitative synthesis. *Lancet*. 2005 Sep 3-9;366(9488):825-31. PubMed PMID:  
23 16139657. Epub 2005/09/06. eng.
- 24 33. Campbell NC, Murray E, Darbyshire J, Emery J, Farmer A, Griffiths F, et al. Designing and  
25 evaluating complex interventions to improve health care. *BMJ (Clinical research ed)*. 2007 Mar  
26 3;334(7591):455-9. PubMed PMID: 17332585. Pubmed Central PMCID: PMC1808182. Epub  
27 2007/03/03. eng.
- 28 34. Craig P, Dieppe P, Macintyre S, Michie S, Nazareth I, Petticrew M. Developing and evaluating  
29 complex interventions: the new Medical Research Council guidance. *BMJ (Clinical research ed)*.  
30 2008;337:a1655. PubMed PMID: 18824488. Pubmed Central PMCID: PMC2769032. Epub  
31 2008/10/01. eng.
- 32 35. Emery JD, Walter FM, Gray V, Sinclair C, Howting D, Bulsara M, et al. Diagnosing cancer in  
33 the bush: a mixed methods study of GP and specialist diagnostic intervals in rural Western Australia.  
34 *Family practice*. 2013 Jun 3. PubMed PMID: 23699107. Epub 2013/05/24. Eng.
- 35 36. WA Country Health Service. Regional Profiles  
36 <http://www.wacountry.health.wa.gov.au/index.php?id=506>: WA Country Health Service; 2011.
- 37 37. Adamson J, Cockayne S, Puffer S, Torgerson DJ, Adamson J, Cockayne S, et al. Review of  
38 randomised trials using the post-randomised consent (Zelen's) design. *Contemporary Clinical Trials*.  
39 2006 8;27(4):305-19.
- 40 38. National Breast and Ovarian Cancer Centre. *The investigation of a new breast symptom: a*  
41 *guide for General Practitioners*. Australia: National Breast and Ovarian Cancer Centre; 2006.
- 42 39. Department of Health WA. *Model of Care for Cancer*. Perth:WA Cancer and Palliative Care  
43 Network 2008.
- 44 40. Grimshaw JM, Thomas RE, MacLennan G, Fraser C, Ramsay CR, Vale L, et al. Effectiveness  
45 and efficiency of guideline dissemination and implementation strategies. *Health technology*  
46 *assessment (Winchester, England)*. 2004 Feb;8(6):iii-iv, 1-72. PubMed PMID: 14960256. Epub  
47 2004/02/13. eng.
- 48 41. Olesen F, Hansen RP, Vedsted P. Delay in diagnosis: the experience in Denmark. *British*  
49 *journal of cancer*. 2009 Dec 3;101 Suppl 2:S5-8. PubMed PMID: 19956163. Pubmed Central PMCID:  
50 2790711. Epub 2009/12/04. eng.
- 51 42. Neal RD, Nafees S, Pasterfield D, Hood K, Hendry M, Gollins S, et al. Patient-reported  
52 measurement of time to diagnosis in cancer: development of the Cancer Symptom Interval Measure  
53  
54  
55  
56  
57  
58  
59  
60

- 1  
2  
3 (C-SIM) and randomised controlled trial of method of delivery. *BMC health services research*.  
4 2014;14:3. PubMed PMID: 24387663. Pubmed Central PMCID: PMC3922822. Epub 2014/01/07. eng.  
5 43. Discovery Programme. The Symptom Study [http://discovery-](http://discovery-programme.org/symptom_study.php)  
6 [programme.org/symptom\\_study.php](http://discovery-programme.org/symptom_study.php); Discovery Programme; 2014.  
7 44. Department of Health WA. Data linkage WA <http://www.datalinkage-wa.org.au/>;  
8 Department of Health, Western Australia; 2014.  
9 45. Campbell MK, Mollison J, Steen N, Grimshaw JM, Eccles M. Analysis of cluster randomized  
10 trials in primary care: a practical approach. *Family practice*. 2000 April 1, 2000;17(2):192-6.  
11 46. Yuen E LD, Cisbani L, Rabinowitz C, Da Palma R, Maio V, Leoni M, Grilli R,. Using  
12 administrative data to identify and stage breast cancer cases: implications for assessing quality of  
13 care. *Tumori*. 2011;97(4):428-35.  
14 47. Cooper GS, Yuan Z, Stange KC, Amini SB, Dennis LK, Rimm AA. The utility of Medicare claims  
15 data for measuring cancer stage. *Medical care*. 1999 Jul;37(7):706-11. PubMed PMID: 10424641.  
16 Epub 1999/07/29. eng.  
17 48. Thompson B, Lumley J, Coory M. Hospital morbidity data for determining spread of disease at  
18 diagnosis for colorectal cancer: a validation study. *Asia-Pacific journal of clinical oncology*. 2012  
19 Sep;8(3):e17-22. PubMed PMID: 22898060. Epub 2012/08/18. eng.  
20 49. Thompson B, Watson M, Bowman R, Fong K, Coory M. Hospital-activity data inaccurate for  
21 determining spread-of-disease at diagnosis for non-small cell lung cancer. *Australian and New*  
22 *Zealand journal of public health*. 2012 Jun;36(3):212-7. PubMed PMID: 22672025. Epub 2012/06/08.  
23 eng.  
24 50. Campbell MK, Thomson S, Ramsay CR, MacLennan GS, Grimshaw JM. Sample size calculator  
25 for cluster randomized trials. *Computers in biology and medicine*. 2004 Mar;34(2):113-25. PubMed  
26 PMID: 14972631. Epub 2004/02/20. eng.  
27 51. Statistics. ABo. 3232.0 Population by Age and Sex, Regions of Australia Canberra: Australian  
28 Bureau of Statistics; 2011 [cited 2014].  
29  
30  
31  
32  
33  
34  
35  
36  
37  
38  
39  
40  
41  
42  
43  
44  
45  
46  
47  
48  
49  
50  
51  
52  
53  
54  
55  
56  
57  
58  
59  
60

1  
2  
3  
4  
5  
6  
7  
8  
9  
10  
11  
12  
13  
14  
15  
16  
17  
18  
19  
20  
21  
22  
23  
24  
25  
26  
27  
28  
29  
30  
31  
32  
33  
34  
35  
36  
37  
38  
39  
40  
41  
42  
43  
44  
45  
46  
47  
48  
49  
50  
51  
52  
53  
54  
55  
56  
57  
58  
59  
60

# Tables and Figures

Figure 1: Model of Pathways to Treatment (30, 31)

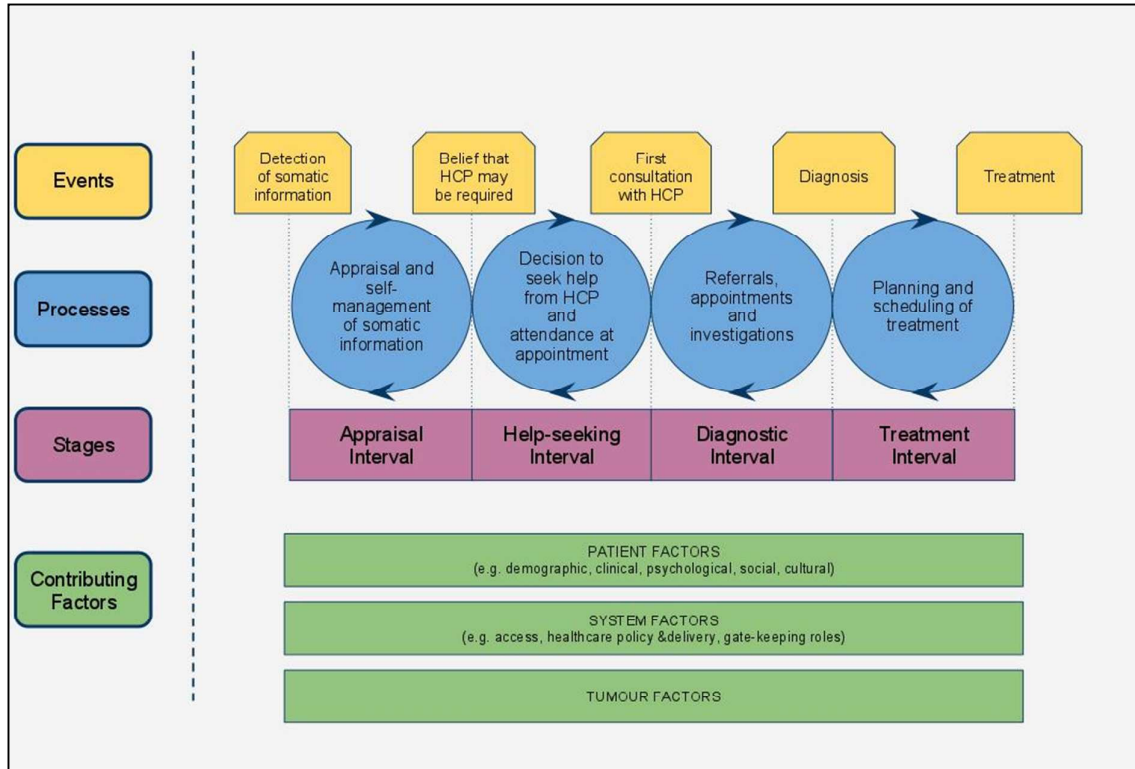

Review only

Figure 2: Map of Western Australia depicting the regional boundaries of Trial Area A, receiving the community intervention, and Trial Area B, acting as the community control.

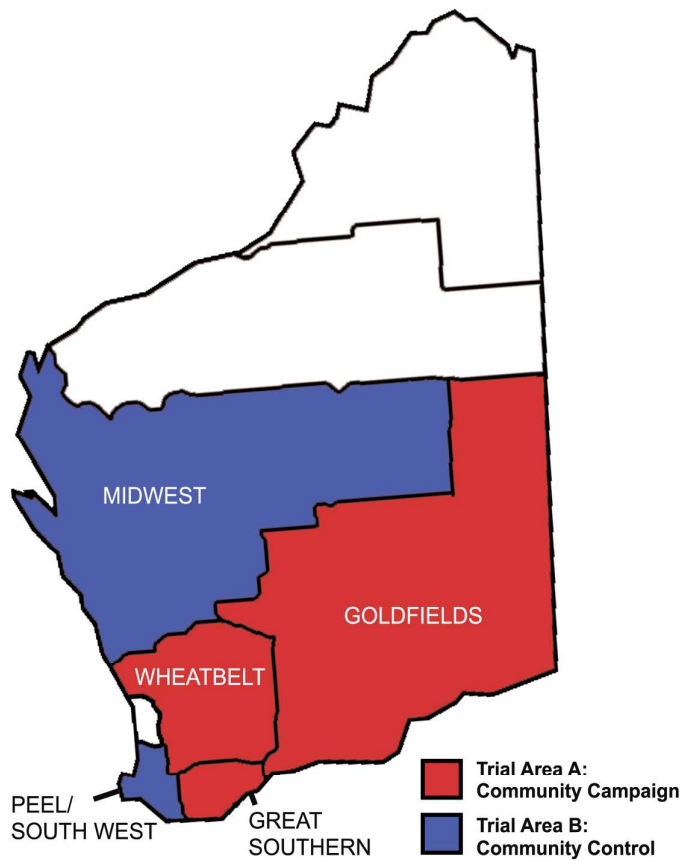

1  
2  
3  
4  
5  
6  
7  
8  
9  
10  
11  
12  
13  
14  
15  
16  
17  
18  
19  
20  
21  
22  
23  
24  
25  
26  
27  
28  
29  
30  
31  
32  
33  
34  
35  
36  
37  
38  
39  
40  
41  
42  
43  
44  
45  
46  
47  
48  
49  
50  
51  
52  
53  
54  
55  
56  
57  
58  
59  
60

Figure 3: The 2x2 factorial cluster randomised controlled trial design.(51)

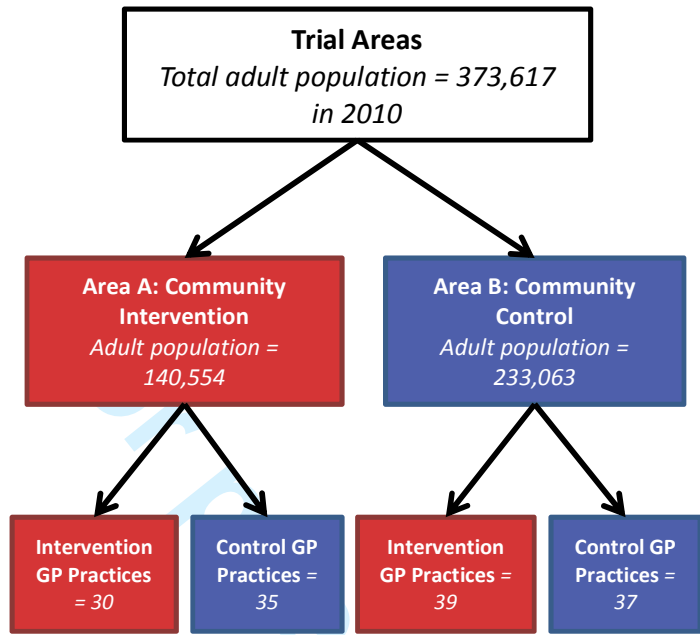

Figure 4: Examples of Find Cancer Early resources – General Symptom Checklist, Prostate postcard and Tell your doctor postcard.

General Symptom Checklist



**Are you over 40?**  
Have you had any of these...

**... for more than 4 weeks?**

- Blood in your poo
- Problems peeing
- Looser poo
- Unexplained weight loss
- An unusual pain, lump or swelling anywhere in your body
- Becoming more short of breath
- A persistent cough

**... once off?**

- Coughing up blood
- Blood in your pee

**If you have...  
Tell your doctor**

The earlier cancer is found, the greater the chance of successful treatment.

**Find Cancer Early**  
Cancer Council Helpline 13 11 20  
Cancer Council

For more information visit: [www.findcancerearly.com.au](http://www.findcancerearly.com.au)

Prostate Symptom Postcard (Front and Back)



**"How's the ute?  
How's the Mrs?  
How's the waterworks?"**

If your peeing is causing you problems, tell your doctor.

Turn over to find out more information



**Tell your doctor if you have any of these symptoms:**

- If you ever find blood in your pee
- Waking frequently at night to pee
- Sudden or urgent need to pee
- Difficulty starting or stopping peeing
- Slow flow
- Pain when you pee
- Unexplained weight loss

These symptoms might be due to prostate cancer and the earlier it's found, the greater the chance of successful treatment.

For more information visit: [www.findcancerearly.com.au](http://www.findcancerearly.com.au)

Tell your doctor Postcard (Front and Back)



**Your doctor is never too busy to see you**

Tell your doctor about any changes with your body, no matter how unimportant you think they are.

Turn over for advice about visiting your doctor



**Tell your doctor – if you notice any of the possible symptoms of cancer**

Lots of questions and concerns may pass through your mind when you decide to see your doctor:

|                                                                                                                                                                                                                                                                                                                                                                                |                                                                                                                                                                                                                                                                                                                                                    |
|--------------------------------------------------------------------------------------------------------------------------------------------------------------------------------------------------------------------------------------------------------------------------------------------------------------------------------------------------------------------------------|----------------------------------------------------------------------------------------------------------------------------------------------------------------------------------------------------------------------------------------------------------------------------------------------------------------------------------------------------|
| <p><b>Excuse</b></p> <ul style="list-style-type: none"> <li><input checked="" type="checkbox"/> The doctor is always too busy. It's too hard to get an appointment</li> <li><input checked="" type="checkbox"/> When I get to the doctors my mind goes blank</li> <li><input checked="" type="checkbox"/> I'm worried about what might happen when I see the doctor</li> </ul> | <p><b>Fact</b></p> <ul style="list-style-type: none"> <li><input checked="" type="checkbox"/> Phoning early in the morning can help</li> <li><input checked="" type="checkbox"/> Writing a list jogs your memory</li> <li><input checked="" type="checkbox"/> The doctor might examine you, reassure you, order some tests or refer you</li> </ul> |
|--------------------------------------------------------------------------------------------------------------------------------------------------------------------------------------------------------------------------------------------------------------------------------------------------------------------------------------------------------------------------------|----------------------------------------------------------------------------------------------------------------------------------------------------------------------------------------------------------------------------------------------------------------------------------------------------------------------------------------------------|

For more useful tips visit: [www.findcancerearly.com.au](http://www.findcancerearly.com.au)

Review only



1  
2  
3  
4  
5  
6  
7  
8  
9  
10  
11  
12  
13  
14  
15  
16  
17  
18  
19  
20  
21  
22  
23  
24  
25  
26  
27  
28  
29  
30  
31  
32  
33  
34  
35  
36  
37  
38  
39  
40  
41  
42  
43  
44  
45  
46  
47  
48  
49  
50  
51  
52  
53  
54  
55  
56  
57  
58  
59  
60

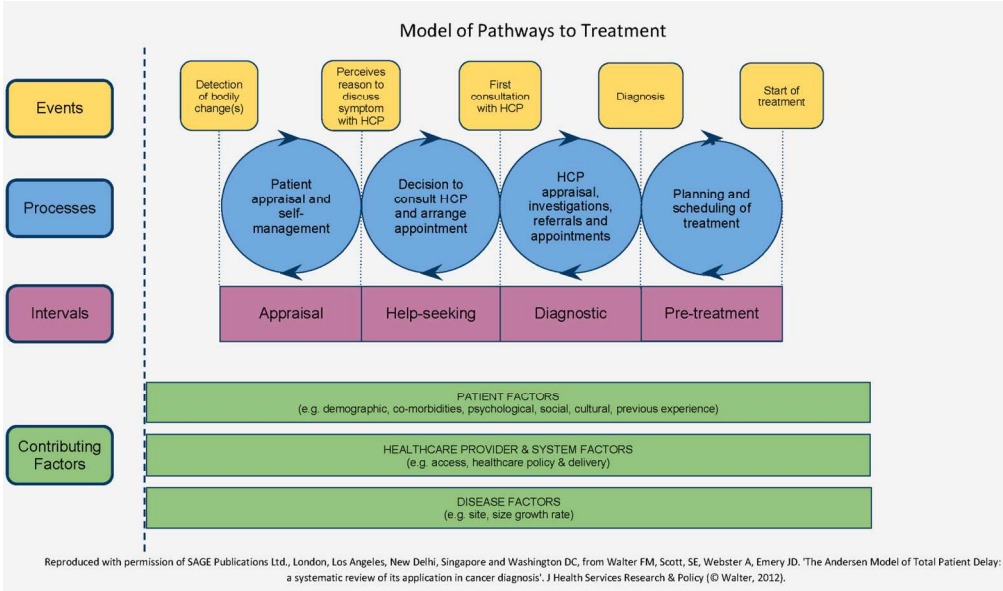

Model of Pathways to Treatment (30, 31)  
152x90mm (300 x 300 DPI)

review only

1  
2  
3  
4  
5  
6  
7  
8  
9  
10  
11  
12  
13  
14  
15  
16  
17  
18  
19  
20  
21  
22  
23  
24  
25  
26  
27  
28  
29  
30  
31  
32  
33  
34  
35  
36  
37  
38  
39  
40  
41  
42  
43  
44  
45  
46  
47  
48  
49  
50  
51  
52  
53  
54  
55  
56  
57  
58  
59  
60



Map of Western Australia depicting the regional boundaries of Trial Area A, receiving the community intervention, and Trial Area B, acting as the community control.

104x147mm (300 x 300 DPI)

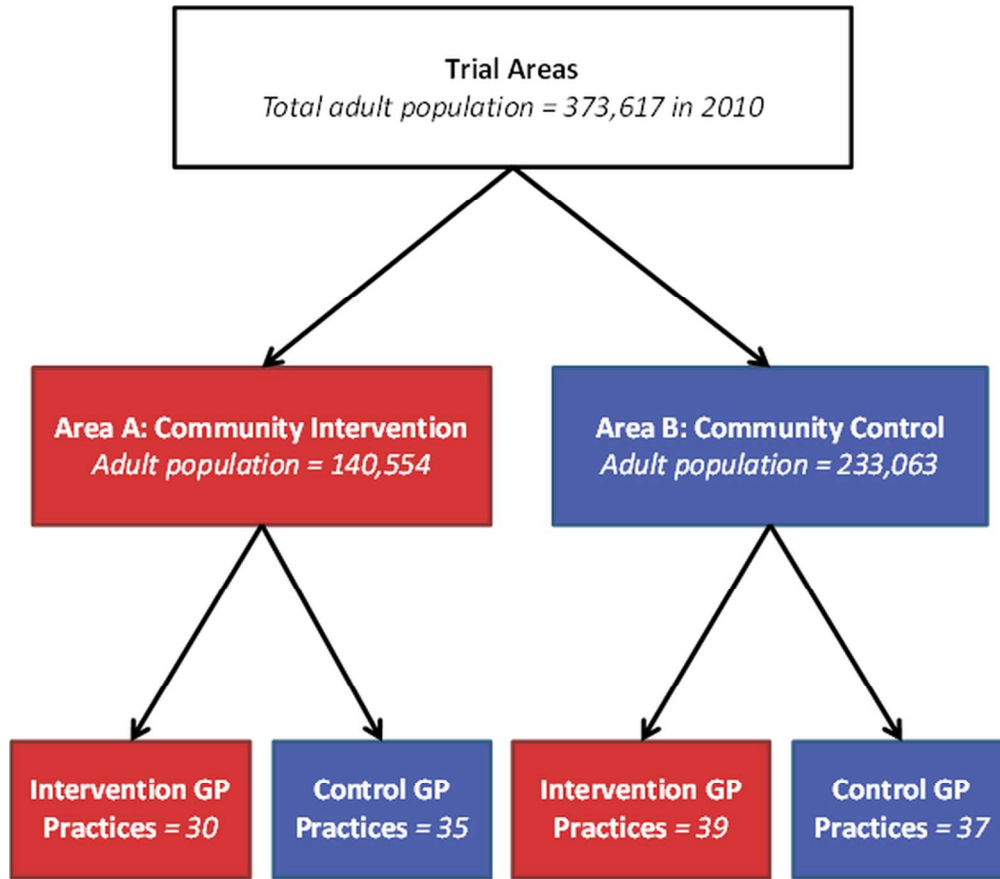

The 2x2 factorial cluster randomised controlled trial design.(37)  
103x90mm (300 x 300 DPI)

only

1  
2  
3  
4  
5  
6  
7  
8  
9  
10  
11  
12  
13  
14  
15  
16  
17  
18  
19  
20  
21  
22  
23  
24  
25  
26  
27  
28  
29  
30  
31  
32  
33  
34  
35  
36  
37  
38  
39  
40  
41  
42  
43  
44  
45  
46  
47  
48  
49  
50  
51  
52  
53  
54  
55  
56  
57  
58  
59  
60

### General Symptom Checklist

**Are you over 40?**  
Have you had any of these...

... for more than 4 weeks?

- Blood in your poo
- Problems peeing
- Looser poo
- Unexplained weight loss
- An unusual pain, lump or swelling anywhere in your body
- Becoming more short of breath
- A persistent cough

... once off?

- Coughing up blood
- Blood in your pee

**If you have...  
Tell your doctor**

The earlier cancer is found, the greater the chance of successful treatment.

Cancer Council  
**Helpline**  
**13 11 20**

For more information visit:  
[www.findcancerearly.com.au](http://www.findcancerearly.com.au)

### Prostate Symptom Postcard (Front and Back)

**"How's the ute?  
How's the Mrs?  
How's the waterworks?"**

If your peeing is causing you problems, tell your doctor.

Turn over to find out more information

Tell your doctor if you have any of these symptoms:

- If you ever find blood in your pee
- Waking frequently at night to pee
- Sudden or urgent need to pee
- Difficulty starting or stopping peeing
- Slow flow
- Pain when you pee
- Unexplained weight loss

These symptoms might be due to prostate cancer and the earlier it's found, the greater the chance of successful treatment.

For more information visit: [www.findcancerearly.com.au](http://www.findcancerearly.com.au)

Helpline  
**13 11 20**

### Tell your doctor Postcard (Front and Back)

**Your doctor is never too busy to see you**

Tell your doctor about any changes with your body, no matter how small or how often they occur.

Turn over for advice about visiting your doctor

Tell your doctor - if you notice any of the possible symptoms of cancer

Lots of questions and concerns may pass through your mind when you decide to see your doctor.

|                                                                                                                                                                                                                                                                                                                                                                                    |                                                                                                                                                                                                                                                                                                                                                            |
|------------------------------------------------------------------------------------------------------------------------------------------------------------------------------------------------------------------------------------------------------------------------------------------------------------------------------------------------------------------------------------|------------------------------------------------------------------------------------------------------------------------------------------------------------------------------------------------------------------------------------------------------------------------------------------------------------------------------------------------------------|
| <p><b>Excuse</b></p> <ul style="list-style-type: none"> <li><input checked="" type="checkbox"/> The doctor is always too busy, it's too hard to get an appointment.</li> <li><input checked="" type="checkbox"/> When I get to the doctor's my mind goes blank.</li> <li><input checked="" type="checkbox"/> I'm worried about what might happen when I see the doctor.</li> </ul> | <p><b>Fact!</b></p> <ul style="list-style-type: none"> <li><input checked="" type="checkbox"/> Phoning early in the morning can help.</li> <li><input checked="" type="checkbox"/> Writing a list jogs your memory.</li> <li><input checked="" type="checkbox"/> The doctor might examine you, reassure you, and/or arrange tests or refer you.</li> </ul> |
|------------------------------------------------------------------------------------------------------------------------------------------------------------------------------------------------------------------------------------------------------------------------------------------------------------------------------------------------------------------------------------|------------------------------------------------------------------------------------------------------------------------------------------------------------------------------------------------------------------------------------------------------------------------------------------------------------------------------------------------------------|

For more useful tips visit: [www.findcancerearly.com.au](http://www.findcancerearly.com.au)

Helpline  
**13 11 20**

Examples of Find Cancer Early resources – General Symptom Checklist, Prostate postcard and Tell your doctor postcard.  
209x147mm (300 x 300 DPI)

Review only

For peer review only - <http://bmjopen.bmj.com/site/about/guidelines.xhtml>

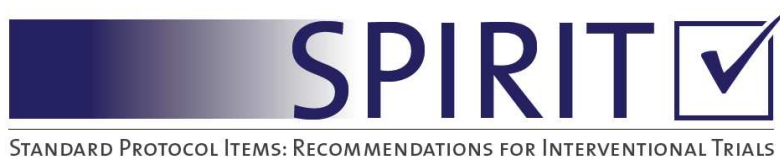

SPIRIT 2013 Checklist: Recommended items to address in a clinical trial protocol and related documents\*

| Section/item                      | Item No | Description                                                                                                                                                                                                                                                                                  |
|-----------------------------------|---------|----------------------------------------------------------------------------------------------------------------------------------------------------------------------------------------------------------------------------------------------------------------------------------------------|
| <b>Administrative information</b> |         |                                                                                                                                                                                                                                                                                              |
| Title                             | 1       | Descriptive title identifying the study design, population, interventions, and, if applicable, trial acronym Yes                                                                                                                                                                             |
| Trial registration                | 2a      | Trial identifier and registry name. If not yet registered, name of intended registry Yes                                                                                                                                                                                                     |
|                                   | 2b      | All items from the World Health Organization Trial Registration Data Set Yes                                                                                                                                                                                                                 |
|                                   | 3       | Date and version identifier Yes                                                                                                                                                                                                                                                              |
| Protocol version                  | 3       | Date and version identifier Yes                                                                                                                                                                                                                                                              |
| Funding                           | 4       | Sources and types of financial, material, and other support Yes                                                                                                                                                                                                                              |
| Roles and responsibilities        | 5a      | Names, affiliations, and roles of protocol contributors Yes                                                                                                                                                                                                                                  |
|                                   | 5b      | Name and contact information for the trial sponsor Yes                                                                                                                                                                                                                                       |
|                                   | 5c      | Role of study sponsor and funders, if any, in study design; collection, management, analysis, and interpretation of data; writing of the report; and the decision to submit the report for publication, including whether they will have ultimate authority over any of these activities Yes |
|                                   | 5d      | Composition, roles, and responsibilities of the coordinating centre, steering committee, endpoint adjudication committee, data management team, and other individuals or groups overseeing the trial, if applicable (see Item 21a for data monitoring committee) Yes                         |
| <b>Introduction</b>               |         |                                                                                                                                                                                                                                                                                              |
| Background and rationale          | 6a      | Description of research question and justification for undertaking the trial, including summary of relevant studies (published and unpublished) examining benefits and harms for each intervention Yes                                                                                       |
|                                   | 6b      | Explanation for choice of comparators Yes                                                                                                                                                                                                                                                    |
| Objectives                        | 7       | Specific objectives or hypotheses Yes                                                                                                                                                                                                                                                        |
| Trial design                      | 8       | Description of trial design including type of trial (eg, parallel group, crossover, factorial, single group), allocation ratio, and framework (eg, superiority, equivalence, noninferiority, exploratory) Yes                                                                                |

**Methods: Participants, interventions, and outcomes**

|                      |     |                                                                                                                                                                                                                                                                                                                                                                                    |
|----------------------|-----|------------------------------------------------------------------------------------------------------------------------------------------------------------------------------------------------------------------------------------------------------------------------------------------------------------------------------------------------------------------------------------|
| Study setting        | 9   | Description of study settings (eg, community clinic, academic hospital) and list of countries where data will be collected. Reference to where list of study sites can be obtained Yes                                                                                                                                                                                             |
| Eligibility criteria | 10  | Inclusion and exclusion criteria for participants. If applicable, eligibility criteria for study centres and individuals who will perform the interventions (eg, surgeons, psychotherapists) Yes                                                                                                                                                                                   |
| Interventions        | 11a | Interventions for each group with sufficient detail to allow replication, including how and when they will be administered Yes                                                                                                                                                                                                                                                     |
|                      | 11b | Criteria for discontinuing or modifying allocated interventions for a given trial participant (eg, drug dose change in response to harms, participant request, or improving/worsening disease) N/A                                                                                                                                                                                 |
|                      | 11c | Strategies to improve adherence to intervention protocols, and any procedures for monitoring adherence (eg, drug tablet return, laboratory tests) N/A                                                                                                                                                                                                                              |
|                      | 11d | Relevant concomitant care and interventions that are permitted or prohibited during the trial N/A                                                                                                                                                                                                                                                                                  |
| Outcomes             | 12  | Primary, secondary, and other outcomes, including the specific measurement variable (eg, systolic blood pressure), analysis metric (eg, change from baseline, final value, time to event), method of aggregation (eg, median, proportion), and time point for each outcome. Explanation of the clinical relevance of chosen efficacy and harm outcomes is strongly recommended Yes |
| Participant timeline | 13  | Time schedule of enrolment, interventions (including any run-ins and washouts), assessments, and visits for participants. Yes                                                                                                                                                                                                                                                      |
| Sample size          | 14  | Estimated number of participants needed to achieve study objectives and how it was determined, including clinical and statistical assumptions supporting any sample size calculations Yes                                                                                                                                                                                          |
| Recruitment          | 15  | Strategies for achieving adequate participant enrolment to reach target sample size Yes                                                                                                                                                                                                                                                                                            |

**Methods: Assignment of interventions (for controlled trials)**

## Allocation:

|                     |     |                                                                                                                                                                                                                                                                                                                                                              |
|---------------------|-----|--------------------------------------------------------------------------------------------------------------------------------------------------------------------------------------------------------------------------------------------------------------------------------------------------------------------------------------------------------------|
| Sequence generation | 16a | Method of generating the allocation sequence (eg, computer-generated random numbers), and list of any factors for stratification. To reduce predictability of a random sequence, details of any planned restriction (eg, blocking) should be provided in a separate document that is unavailable to those who enrol participants or assign interventions Yes |
|---------------------|-----|--------------------------------------------------------------------------------------------------------------------------------------------------------------------------------------------------------------------------------------------------------------------------------------------------------------------------------------------------------------|

|    |                |     |                                                                         |
|----|----------------|-----|-------------------------------------------------------------------------|
| 1  |                |     |                                                                         |
| 2  | Allocation     | 16b | Mechanism of implementing the allocation sequence (eg, central          |
| 3  | concealment    |     | telephone; sequentially numbered, opaque, sealed envelopes),            |
| 4  | mechanism      |     | describing any steps to conceal the sequence until interventions are    |
| 5  |                |     | assigned Yes                                                            |
| 6  |                |     |                                                                         |
| 7  | Implementation | 16c | Who will generate the allocation sequence, who will enrol participants, |
| 8  |                |     | and who will assign participants to interventions Yes                   |
| 9  |                |     |                                                                         |
| 10 | Blinding       | 17a | Who will be blinded after assignment to interventions (eg, trial        |
| 11 | (masking)      |     | participants, care providers, outcome assessors, data analysts), and    |
| 12 |                |     | how Yes                                                                 |
| 13 |                |     |                                                                         |
| 14 |                | 17b | If blinded, circumstances under which unblinding is permissible, and    |
| 15 |                |     | procedure for revealing a participant's allocated intervention during   |
| 16 |                |     | the trial N/A                                                           |
| 17 |                |     |                                                                         |
| 18 |                |     |                                                                         |

### 19 **Methods: Data collection, management, and analysis**

|    |                 |     |                                                                          |
|----|-----------------|-----|--------------------------------------------------------------------------|
| 20 |                 |     |                                                                          |
| 21 | Data collection | 18a | Plans for assessment and collection of outcome, baseline, and other      |
| 22 | methods         |     | trial data, including any related processes to promote data quality (eg, |
| 23 |                 |     | duplicate measurements, training of assessors) and a description of      |
| 24 |                 |     | study instruments (eg, questionnaires, laboratory tests) along with      |
| 25 |                 |     | their reliability and validity, if known. Reference to where data        |
| 26 |                 |     | collection forms can be found, if not in the protocol Yes                |
| 27 |                 |     |                                                                          |
| 28 |                 | 18b | Plans to promote participant retention and complete follow-up,           |
| 29 |                 |     | including list of any outcome data to be collected for participants who  |
| 30 |                 |     | discontinue or deviate from intervention protocols N/A                   |
| 31 |                 |     |                                                                          |
| 32 |                 |     |                                                                          |
| 33 | Data            | 19  | Plans for data entry, coding, security, and storage, including any       |
| 34 | management      |     | related processes to promote data quality (eg, double data entry;        |
| 35 |                 |     | range checks for data values). Reference to where details of data        |
| 36 |                 |     | management procedures can be found, if not in the protocol. Yes          |
| 37 |                 |     |                                                                          |
| 38 | Statistical     | 20a | Statistical methods for analysing primary and secondary outcomes.        |
| 39 | methods         |     | Reference to where other details of the statistical analysis plan can be |
| 40 |                 |     | found, if not in the protocol Yes                                        |
| 41 |                 |     |                                                                          |
| 42 |                 | 20b | Methods for any additional analyses (eg, subgroup and adjusted           |
| 43 |                 |     | analyses) Yes                                                            |
| 44 |                 |     |                                                                          |
| 45 |                 | 20c | Definition of analysis population relating to protocol non-adherence     |
| 46 |                 |     | (eg, as randomised analysis), and any statistical methods to handle      |
| 47 |                 |     | missing data (eg, multiple imputation) Yes                               |
| 48 |                 |     |                                                                          |
| 49 |                 |     |                                                                          |

### 50 **Methods: Monitoring**

|    |                 |     |                                                                      |
|----|-----------------|-----|----------------------------------------------------------------------|
| 51 |                 |     |                                                                      |
| 52 | Data monitoring | 21a | Composition of data monitoring committee (DMC); summary of its role  |
| 53 |                 |     | and reporting structure; statement of whether it is independent from |
| 54 |                 |     | the sponsor and competing interests; and reference to where further  |
| 55 |                 |     | details about its charter can be found, if not in the protocol.      |
| 56 |                 |     | Alternatively, an explanation of why a DMC is not needed Yes         |
| 57 |                 |     |                                                                      |
| 58 |                 |     |                                                                      |
| 59 |                 |     |                                                                      |
| 60 |                 |     |                                                                      |

|    |          |     |                                                                                                                                                                                       |
|----|----------|-----|---------------------------------------------------------------------------------------------------------------------------------------------------------------------------------------|
| 1  |          | 21b | Description of any interim analyses and stopping guidelines, including who will have access to these interim results and make the final decision to terminate the trial N/A           |
| 2  |          |     |                                                                                                                                                                                       |
| 3  |          |     |                                                                                                                                                                                       |
| 4  |          |     |                                                                                                                                                                                       |
| 5  |          |     |                                                                                                                                                                                       |
| 6  | Harms    | 22  | Plans for collecting, assessing, reporting, and managing solicited and spontaneously reported adverse events and other unintended effects of trial interventions or trial conduct N/A |
| 7  |          |     |                                                                                                                                                                                       |
| 8  |          |     |                                                                                                                                                                                       |
| 9  |          |     |                                                                                                                                                                                       |
| 10 | Auditing | 23  | Frequency and procedures for auditing trial conduct, if any, and whether the process will be independent from investigators and the sponsor N/A                                       |
| 11 |          |     |                                                                                                                                                                                       |
| 12 |          |     |                                                                                                                                                                                       |
| 13 |          |     |                                                                                                                                                                                       |

### Ethics and dissemination

|    |                               |     |                                                                                                                                                                                                                                                                                         |
|----|-------------------------------|-----|-----------------------------------------------------------------------------------------------------------------------------------------------------------------------------------------------------------------------------------------------------------------------------------------|
| 14 |                               |     |                                                                                                                                                                                                                                                                                         |
| 15 |                               |     |                                                                                                                                                                                                                                                                                         |
| 16 |                               |     |                                                                                                                                                                                                                                                                                         |
| 17 | Research ethics approval      | 24  | Plans for seeking research ethics committee/institutional review board (REC/IRB) approval Yes                                                                                                                                                                                           |
| 18 |                               |     |                                                                                                                                                                                                                                                                                         |
| 19 |                               |     |                                                                                                                                                                                                                                                                                         |
| 20 | Protocol amendments           | 25  | Plans for communicating important protocol modifications (eg, changes to eligibility criteria, outcomes, analyses) to relevant parties (eg, investigators, REC/IRBs, trial participants, trial registries, journals, regulators) NA                                                     |
| 21 |                               |     |                                                                                                                                                                                                                                                                                         |
| 22 |                               |     |                                                                                                                                                                                                                                                                                         |
| 23 |                               |     |                                                                                                                                                                                                                                                                                         |
| 24 |                               |     |                                                                                                                                                                                                                                                                                         |
| 25 | Consent or assent             | 26a | Who will obtain informed consent or assent from potential trial participants or authorised surrogates, and how (see Item 32) Yes                                                                                                                                                        |
| 26 |                               |     |                                                                                                                                                                                                                                                                                         |
| 27 |                               |     |                                                                                                                                                                                                                                                                                         |
| 28 |                               | 26b | Additional consent provisions for collection and use of participant data and biological specimens in ancillary studies, if applicable N/A                                                                                                                                               |
| 29 |                               |     |                                                                                                                                                                                                                                                                                         |
| 30 |                               |     |                                                                                                                                                                                                                                                                                         |
| 31 | Confidentiality               | 27  | How personal information about potential and enrolled participants will be collected, shared, and maintained in order to protect confidentiality before, during, and after the trial Yes                                                                                                |
| 32 |                               |     |                                                                                                                                                                                                                                                                                         |
| 33 |                               |     |                                                                                                                                                                                                                                                                                         |
| 34 |                               |     |                                                                                                                                                                                                                                                                                         |
| 35 |                               |     |                                                                                                                                                                                                                                                                                         |
| 36 | Declaration of interests      | 28  | Financial and other competing interests for principal investigators for the overall trial and each study site Yes                                                                                                                                                                       |
| 37 |                               |     |                                                                                                                                                                                                                                                                                         |
| 38 |                               |     |                                                                                                                                                                                                                                                                                         |
| 39 | Access to data                | 29  | Statement of who will have access to the final trial dataset, and disclosure of contractual agreements that limit such access for investigators N/A                                                                                                                                     |
| 40 |                               |     |                                                                                                                                                                                                                                                                                         |
| 41 |                               |     |                                                                                                                                                                                                                                                                                         |
| 42 |                               |     |                                                                                                                                                                                                                                                                                         |
| 43 | Ancillary and post-trial care | 30  | Provisions, if any, for ancillary and post-trial care, and for compensation to those who suffer harm from trial participation N/A                                                                                                                                                       |
| 44 |                               |     |                                                                                                                                                                                                                                                                                         |
| 45 |                               |     |                                                                                                                                                                                                                                                                                         |
| 46 | Dissemination policy          | 31a | Plans for investigators and sponsor to communicate trial results to participants, healthcare professionals, the public, and other relevant groups (eg, via publication, reporting in results databases, or other data sharing arrangements), including any publication restrictions Yes |
| 47 |                               |     |                                                                                                                                                                                                                                                                                         |
| 48 |                               |     |                                                                                                                                                                                                                                                                                         |
| 49 |                               |     |                                                                                                                                                                                                                                                                                         |
| 50 |                               |     |                                                                                                                                                                                                                                                                                         |
| 51 |                               |     |                                                                                                                                                                                                                                                                                         |
| 52 |                               | 31b | Authorship eligibility guidelines and any intended use of professional writers Yes                                                                                                                                                                                                      |
| 53 |                               |     |                                                                                                                                                                                                                                                                                         |
| 54 |                               |     |                                                                                                                                                                                                                                                                                         |
| 55 |                               | 31c | Plans, if any, for granting public access to the full protocol, participant-level dataset, and statistical code N/A                                                                                                                                                                     |
| 56 |                               |     |                                                                                                                                                                                                                                                                                         |
| 57 |                               |     |                                                                                                                                                                                                                                                                                         |
| 58 |                               |     |                                                                                                                                                                                                                                                                                         |
| 59 |                               |     |                                                                                                                                                                                                                                                                                         |
| 60 |                               |     |                                                                                                                                                                                                                                                                                         |



**Appendices**

|                            |    |                                                                                                                                                                                                    |
|----------------------------|----|----------------------------------------------------------------------------------------------------------------------------------------------------------------------------------------------------|
| Informed consent materials | 32 | Model consent form and other related documentation given to participants and authorised surrogates N/A                                                                                             |
| Biological specimens       | 33 | Plans for collection, laboratory evaluation, and storage of biological specimens for genetic or molecular analysis in the current trial and for future use in ancillary studies, if applicable N/A |

---

\*It is strongly recommended that this checklist be read in conjunction with the SPIRIT 2013 Explanation & Elaboration for important clarification on the items. Amendments to the protocol should be tracked and dated. The SPIRIT checklist is copyrighted by the SPIRIT Group under the Creative Commons "[Attribution-NonCommercial-NoDerivs 3.0 Unported](#)" license.
